# Supplementary material for: Neighborhood-level and individual-level socioeconomic status and self-reported management of ischaemic heart disease: cross-sectional results from the Korea Health Examinees Study
Source: PubMed Central journal article supplement — BMJ Open. 2019 Mar 27;9(3):e021577. doi: 10.1136/bmjopen-2018-021577 (PMC6475355; doi:10.1136/bmjopen-2018-021577), 2019-03-27
Supplement: bmjopen-2018-021577.draft_revisions.pdf [file bmjopen-2018-021577.draft_revisions.pdf]

# BMJ Open

BMJ Open is committed to open peer review. As part of this commitment we make the peer review history of every article we publish publicly available.

When an article is published we post the peer reviewers' comments and the authors' responses online. We also post the versions of the paper that were used during peer review. These are the versions that the peer review comments apply to.

The versions of the paper that follow are the versions that were submitted during the peer review process. They are not the versions of record or the final published versions. They should not be cited or distributed as the published version of this manuscript.

BMJ Open is an open access journal and the full, final, typeset and author-corrected version of record of the manuscript is available on our site with no access controls, subscription charges or pay-per-view fees (<http://bmjopen.bmj.com>).

If you have any questions on BMJ Open's open peer review process please email [info.bmjopen@bmj.com](mailto:info.bmjopen@bmj.com)

# BMJ Open

## Neighborhood- and Individual-level Socioeconomic Status and Self-reported Management of Ischemic Heart Disease: Results from the Health Examinees Study

|                               |                                                                                                                                                                                                                                                                                                                                                                                                                                                                                                                                                                                                                                                                                                                                                                                                  |
|-------------------------------|--------------------------------------------------------------------------------------------------------------------------------------------------------------------------------------------------------------------------------------------------------------------------------------------------------------------------------------------------------------------------------------------------------------------------------------------------------------------------------------------------------------------------------------------------------------------------------------------------------------------------------------------------------------------------------------------------------------------------------------------------------------------------------------------------|
| Journal:                      | <i>BMJ Open</i>                                                                                                                                                                                                                                                                                                                                                                                                                                                                                                                                                                                                                                                                                                                                                                                  |
| Manuscript ID                 | bmjopen-2018-021577                                                                                                                                                                                                                                                                                                                                                                                                                                                                                                                                                                                                                                                                                                                                                                              |
| Article Type:                 | Research                                                                                                                                                                                                                                                                                                                                                                                                                                                                                                                                                                                                                                                                                                                                                                                         |
| Date Submitted by the Author: | 09-Jan-2018                                                                                                                                                                                                                                                                                                                                                                                                                                                                                                                                                                                                                                                                                                                                                                                      |
| Complete List of Authors:     | Heo, Jongho; Seoul National University College of Medicine, JW Lee Center for Global Medicine<br>Oh, Juhwan; Seoul National University College of Medicine, JW Lee Center for Global Medicine<br>Lee, Hwa-Young ; Seoul National University College of Medicine, JW LEE Center for Global Medicine<br>Choi, Ji-Yeob; Seoul National University College of Medicine,<br>Kim, Sujin; Korea Institute for Health and Social Affairs<br>Subramanian, S V; Harvard School of Public Health, Department of Society, Human Development and<br>Lee, Jong-Koo; Seoul National University College of Medicine, Department of Family Medicine; Seoul National University Hospital, Policy and Development<br>Kang, Daehee; College of Medicine Seoul National University, Department of Preventive Medicine |
| Keywords:                     | angina, myocardial infraction, multilevel analysis, MCMC, SES, Korea                                                                                                                                                                                                                                                                                                                                                                                                                                                                                                                                                                                                                                                                                                                             |
|                               |                                                                                                                                                                                                                                                                                                                                                                                                                                                                                                                                                                                                                                                                                                                                                                                                  |

SCHOLARONE™  
Manuscripts

# Neighborhood- and Individual-level Socioeconomic Status and Self-reported Management of Ischemic Heart Disease: Results from the Health Examinees Study

Jongho Heo<sup>1</sup>, Juhwan Oh<sup>1</sup>, Hwa-Young Lee<sup>1</sup>, Ji-Yeob Choi<sup>2,3,4</sup>, Sujin Kim<sup>5,6</sup>, SV Subramanian<sup>7</sup>, Jong-Koo Lee<sup>\*1,8</sup>, and Daehee Kang<sup>\*2,3,4,9</sup>

<sup>1</sup>JW Lee Center for Global Medicine, Seoul National University College of Medicine, Seoul, Korea; <sup>2</sup>Department of Biomedical Sciences, Seoul National University Graduate School, Seoul, Korea; <sup>3</sup>Department of Preventive Medicine, Seoul National University College of Medicine, Seoul, Korea; <sup>4</sup>Cancer Research Institute, Seoul National University, Seoul, Korea; <sup>5</sup>Institute for Health and Environment, Seoul National University, Seoul, Korea; <sup>6</sup>Korea Institute for Health and Social Affairs, Sejong-si, South Korea; <sup>7</sup>Department of Social and Behavioral Science, Harvard School of Public Health, Boston, MA, USA; <sup>8</sup>Department of Family Medicine, Seoul National University College of Medicine, Seoul, Korea; <sup>9</sup>Institute of Environmental Medicine, Seoul National University Medical Research Center, Seoul, Korea

**\*JL and DK contributed equally to this paper' as corresponding authors.**

**Corresponding author:**

**Jong-Koo Lee**

JW Lee Center for Global Medicine  
Seoul National University College of Medicine  
Tel: +82-2-740-8922/ Fax: +82-2-766-1185  
E-mail: docmohw@snu.ac.kr

Main text word count: 2,202

Abstract word count: 281

# Neighborhood- and Individual-level Socioeconomic Status and Self-reported Management of Ischemic Heart Disease: Results from the Health Examinees Study

## Abstract

**Objective:** Several studies identified neighborhood context as a predictor of ischemic heart disease (IHD) incidence and mortality. The present study investigates the relationships of individual- and neighborhood-level socioeconomic status (SES) with the odds of proper management of IHD, using baseline survey data from the Health Examinees-Gem study.

**Design:** In this cross-sectional study, we estimated the association of the odds of self-reported proper management with the neighborhood-level income quartile and percentage of college graduates after controlling for individual-level covariates in a cohort of participants in the Health Examinees-Gem study. Additionally, we fitted two-level multilevel logistic regression models using the Markov Chain Monte Carlo function to simultaneously estimate the contributions of individual- and neighborhood-level SES.

**Setting:** A survey conducted at 38 health examination centers and training hospitals in major Korean cities and metropolitan areas during 2004–2013.

**Participants:** 2,909 adult men and women.

**Outcome measure:** The self-reported current status of management after incident angina or myocardial infarction.

**Results:** At the neighborhood level, residence in a higher-income neighborhood was associated with the self-reported proper management of IHD, after controlling for individual-level covariates [odds ratio (OR): 1.25, 95% credible interval (CI): 1.03–1.47]. At the individual level, higher education was associated with the proper management of incident IHD (high school graduation, OR: 1.48, 95% CI: 1.23–1.50); college or higher, OR: 1.42, 95% CI: 1.06–1.50; reference, middle school graduation or below).

**Conclusions:** Our study suggests that policies or interventions aimed at improving the quality and availability of medical resources in low-income areas may also reduce inequalities in IHD management and mortality. Moreover, patient-centered education is essential for proper post-IHD management and reducing IHD mortality, especially when targeted to IHD patients with a low education level.

1  
2  
3  
4 **Keywords:** angina, myocardial infraction, multilevel analysis, MCMC, SES, Korea  
5  
6  
7  
8

9  
10 **Strengths and Limitations of this Study**

- 11  
12  
13  
14  
15  
16  
17  
18  
19  
20  
21  
22  
23  
24  
25  
26  
27  
28  
29  
30  
31  
32  
33  
34  
35  
36  
37  
38  
39  
40  
41  
42  
43  
44  
45  
46  
47  
48  
49  
50  
51  
52  
53  
54  
55  
56  
57  
58  
59  
60
- This study is among the first to examine the association between individual- and neighborhood-level SES and management of ischemic heart disease in Asian countries.
  - Our study benefitted from the use of population-based samples, which enabled a multi-level analysis based on the neighborhood-level socioeconomic status (SES).
  - However, our findings were limited by the cross-sectional study design, use of survey data, and risk of selection bias.

## INTRODUCTION

Ischemic heart disease (IHD), the current leading cause of death in Western countries, is rapidly becoming the leading cause of death in developing countries.<sup>1</sup> To reduce the mortality associated with IHD, researchers and clinicians have stressed the importance of patient management. Based on evidence demonstrating that medication adherence and behavioral lifestyle changes improved prognosis and retarded disease progression, clinical guidelines for incident IHD suggest that patient management should comprise pharmacologic treatments (e.g., antiplatelet therapy, beta-blocker therapy) or lifestyle modifications (e.g., weight control, smoking cessation, blood pressure management).<sup>2,3</sup>

Earlier research suggests that the management of incident IHD may differ by socioeconomic status (SES). Notably, the lower rates of mortality among IHD patients with a high SES<sup>4</sup> may be attributable to the availability of better care,<sup>5</sup> better adherence to therapy, better self-monitoring,<sup>6</sup> and more rapid implementation of behavioral lifestyle changes,<sup>7</sup> which are facilitated by economic, educational, and social resources. Additionally, the neighborhood context plays a critical role in various health outcomes, independent of the individual-level SES.<sup>8,9</sup> Several previous studies have shown that residence in a socioeconomically disadvantaged neighborhoods is associated with a greater risk of IHD<sup>10,11</sup> and shorter survival duration.<sup>12,13</sup> However, few studies have examined the association between the neighborhood SES and IHD management.

To our knowledge, no study has addressed this association in South Korea (hereafter Korea) or another Asian country. Although the IHD-related mortality rate in 2011 remained lower in Korea (42 per 100,000 individuals) than in Western countries, the incidence of IHD in Korea has increased by 60% during the past decade.<sup>14</sup> As this increase may be due to increases in body mass index (BMI) values and an increasingly westernized diet among middle-aged

1  
2  
3  
4 adults,<sup>15</sup> IHD management may significantly reduce disparities in post-IHD survival, as well  
5  
6 as IHD mortality. Therefore, this study aimed to evaluate the individual- and neighborhood-  
7  
8 level SES as the main determinants of IHD management in Korea, using baseline data from a  
9  
10 large population-based cohort study with a multi-level framework.  
11  
12  
13  
14  
15

## 16 **METHODS**

### 17 **Data source**

18  
19  
20 We used baseline survey data from the Health Examinees-Gem (HEXA\_G) study, which was  
21  
22 constructed by dropping inconsistent data collected during pilot HEXA survey periods. The  
23  
24 original HEXA, which is part of the Korean Genome Epidemiology Study (KoGES),<sup>16</sup> was a  
25  
26 large-scale genomic cohort study for which 169,722 community-dwellers aged 40–69 years  
27  
28 were recruited from 38 health examination centers and training hospitals (mainly general  
29  
30 hospitals) in the major Korean cities and metropolitan areas during 2004–2013.<sup>17</sup> Eligible  
31  
32 participants who visited the participating sites for biannual health check-ups covered in full  
33  
34 by the National Health Insurance Program were asked to respond voluntarily to an interview-  
35  
36 based survey conducted by well-trained interviewers using a structured questionnaire. The  
37  
38 survey collected information about socio-demographic characteristics, medical history,  
39  
40 medication usage, family history, and health/lifestyle behaviors. More detailed information  
41  
42 about the HEXA cohort study can be found elsewhere.<sup>16 17</sup>  
43  
44  
45  
46  
47  
48

49 The HEXA-G dataset comprised 139,345 participants [men: 46,977 (33.7%); women: 92,368  
50  
51 (66.3%)]. Participants were excluded because of inconsistencies in data quality control, bio-  
52  
53 specimen collection, a short duration of study participation at 21 centers that participated in a  
54  
55 pilot study, or the withdrawal of provision of personal information for studies. All  
56  
57  
58  
59  
60

1  
2  
3  
4 participants completed a consent form before responding to the survey. The study was  
5  
6 approved by the Institutional Review Board (IRB) of Seoul National University Hospital,  
7  
8 Seoul, Korea (IRB No. 0608-018-179).  
9

### 10 11 12 13 14 **Study outcomes**

15  
16 The outcome of the current study was the self-reported current management status after  
17  
18 incident angina or myocardial infarction. To identify patients with a history of IHD, the  
19  
20 survey included the yes/no question of “Have you ever been diagnosed with angina or  
21  
22 myocardial infarction by a medical doctor in a medical facility?” The sub-population with  
23  
24 “yes” responses then answered a sub-question regarding the current status of the disease,  
25  
26 using the following options: (a) “do not need treatment, as condition is cured”; (b) “currently  
27  
28 receiving treatment”; (c) “was previously managed but is now neglected”; and (d) “have not  
29  
30 received treatment.” We dichotomized these responses as “proper management” and “poor  
31  
32 management” (reference) by combining (a) with (b) and (c) with (d), respectively.  
33  
34  
35  
36  
37  
38  
39  
40  
41

### 42 43 44 45 46 47 48 49 50 51 52 53 54 55 56 57 58 59 60 **Main independent variable**

42 The main neighborhood-level independent variables were (1) the income quartile and (2)  
43  
44 percentage of college graduates. Seventeen neighborhoods were defined as the regions  
45  
46 associated with 17 large general hospitals in 10 provinces and metropolitan areas. The total  
47  
48 catchment area of these hospitals covered 89.3% of the total Korean population. We  
49  
50 determined the neighborhood-level variables by averaging the individual-level income and  
51  
52 education variables within each neighborhood.  
53  
54  
55  
56  
57  
58  
59  
60



## Covariates

The individual-level covariates included sex, age, education, income, marital status, and occupation. Age was categorized into 40–50, 51–60, or 61+ years. Educational level was categorized into middle school or lower, high school graduation, or college graduation or higher. Income was measured by collapsing the data into four categories: <1, 1–2, 2–4, and ≥4 million Korean won (M KRW). Marital status was dichotomized into living with a spouse or not. Occupation was categorized as white collar, blue collar, housewife, or other.

After excluding participants with missing covariate data (n = 23, 0.8%) from those with a history of diagnosed angina or myocardial infarction (n = 2,932), we achieved a study sample of 2,909 adults. Table 1 presents the descriptive statistics of the respondents' information.

## Statistical analysis

Two-level multilevel logistic regression models were fitted with individuals (level 1) nested within neighborhoods (level 2) to estimate the contributions of the individual- and neighborhood-level factors simultaneously. Random intercept models were fitted for the whole study samples to correct for cluster effects of the individual variables within the same neighborhood according to the region identifier in the model. We used the command *runmlwin* to run *MLwiN* within Stata software (Stata Corp. College Station, TX, USA).<sup>18</sup> This command enables researchers to fit multilevel models more quickly with *MLwiN* by taking advantage of the multi-level dataset analysis features included in Stata.<sup>18</sup> *MLwiN* was used to fit a binomial logit response model to an estimation using the Iterative Generalized Least Squares (IGLS) and second-order penalized quasi-likelihood (PQL2).

1  
2  
3  
4 Estimates obtained using the above-described methods are known to exhibit bias for discrete  
5 responses;<sup>19</sup> therefore, we fitted our final model using the Markov chain Monte Carlo  
6 (MCMC) function. Additionally, we adopted the Bayesian estimation function to ensure the  
7 accuracy of the estimates and their standard errors, as a small sample size at level two can  
8 lead to biased estimates.<sup>20 21</sup> The MCMC was conducted to burn-in for 500 simulations,  
9 which yielded distribution starting values to discard, and subsequently to proceed for 5,000  
10 additional simulations to obtain a precise estimate and distribution of interest. Once the  
11 convergence diagnostics were confirmed, the odds ratios (ORs) and 95% credible intervals  
12 (CIs) were presented in a Bayesian framework.  
13  
14  
15  
16  
17  
18  
19  
20  
21  
22  
23  
24  
25  
26

## 27 RESULTS

28  
29  
30 Table 1 presents characteristics of the study sample from the HEXA-Gem dataset, stratified  
31 by the self-reported management of IHD. A total of 2,412 (82.9%) participants reported  
32 proper management, and men comprised the majority of this group (54.2%). By contrast, the  
33 poorly managed group included a higher percentage of women (61.6%). Participants older  
34 than 65 years comprised more than half of the proper management group (52.9%).  
35  
36  
37  
38  
39  
40

41 Table 2 presents the results of the two-level multilevel logistic regression models for proper  
42 IHD management. In the Model 1, the odds of proper management were higher for those with  
43 IHD who resided in higher-income neighborhoods, with an OR of 1.74 (95% CI: 1.04–2.64)  
44 compared to those in low SES neighborhoods. In Model 2, a higher individual education level  
45 was associated with proper IHD management, with ORs of 1.48 (95% CI: 1.20–1.52) and  
46 1.33 (95% CI: 1.09–1.52) for high school graduation and college graduation or higher,  
47 respectively, compared to those with a middle school or lower education. However, no  
48  
49  
50  
51  
52  
53  
54  
55  
56  
57  
58  
59  
60

1  
2  
3  
4 significant associations were observed between an individual's income group and the  
5  
6 likelihood of self-reported proper management. In Model 3, the neighborhood-level income  
7  
8 quartiles remained significantly associated with self-reported proper management even after  
9  
10 adjusting for individual-level factors (OR: 1.25, 95% CI 1.03–1.47) (Figure 1). In this model,  
11  
12 however, the association of residence in a neighborhood with a high percentage of college  
13  
14 graduates with self-reported proper IHD management was not statistically significant. Finally,  
15  
16 all models exhibited significant between-neighborhood variance.  
17  
18  
19  
20  
21

## 22 **DISCUSSION**

23  
24  
25 According to our findings, residence in a neighborhood with a one-unit higher income  
26  
27 quartile was associated with a 25% higher likelihood of self-reported proper IHD  
28  
29 management compared to those living in an adjacent neighborhood with a lower quartile. By  
30  
31 contrast, at the individual level, a higher income was not significantly associated with self-  
32  
33 reported proper IHD management. However, a higher individual education level was  
34  
35 associated with a higher likelihood of self-reported proper IHD management.  
36  
37  
38

39 Previous studies have found that a lower neighborhood SES was associated with a higher risk  
40  
41 of IHD<sup>10 11</sup> and a shorter survival duration after incident IHD.<sup>12 13</sup> Consistent with those  
42  
43 reports, our study showed an association of the neighborhood SES with IHD management  
44  
45 that was independent of individual-level factors. We attribute this association to several  
46  
47 factors. First, residents of higher-income neighborhoods may have greater access to higher  
48  
49 quality medical resources, such as physicians or primary care clinics, near their homes,  
50  
51 regardless of individual income.<sup>22</sup> Second, residents in higher-income neighborhoods may  
52  
53 enjoy a more favorable social environment for IHD management, which might include an  
54  
55  
56  
57  
58  
59  
60

1  
2  
3  
4 increased interest in health maintenance and a greater amount of social support from  
5  
6 neighbors.<sup>23</sup> Third, residents of lower-income neighborhoods might have reduced access to  
7  
8 health-oriented features such as recreation spaces and walkable environments<sup>24</sup> and stores  
9  
10 that sell healthy foods,<sup>25</sup> concomitant with increased access to stores selling cigarettes and/or  
11  
12 alcohol<sup>26</sup> and exposure to other environmental stressors. These factors may have important  
13  
14 implications for self-care practices.  
15

16  
17 At the individual SES level, our study found that the education level was significantly  
18  
19 associated with proper IHD management of IHD, whereas the income status was not.  
20  
21 Similarly, previous studies also reported that IHD management may vary according to an  
22  
23 individual's SES, and suggested that the survivors with lower income and education levels  
24  
25 might fail to manage themselves appropriately because of (a) a lack of knowledge related to  
26  
27 prevention and healthy habits,<sup>27</sup> (b) limited access to care or drugs due to economic  
28  
29 constraints,<sup>28</sup> and (c) a lack of willingness or resources to change their lifestyles.<sup>7</sup> Patient  
30  
31 education has been identified as an important factor in terms of the understanding of a  
32  
33 specific disease process, medication management and adherence, and reported efficacies and  
34  
35 side effects.<sup>3</sup> Previous studies demonstrated improved adherence to suggested management  
36  
37 among IHD patients with higher education levels,<sup>29</sup> whereas patients with lower education  
38  
39 levels may not adhere to guidelines because of a lack of knowledge or understanding about  
40  
41 their disease. Alternatively, our study findings may reflect sub-optimal doctor-patient  
42  
43 communication due to the exceptionally short consultation times with physicians in Korea,  
44  
45 which are generally restricted to 2–3 minutes because of the lack of physicians and fee-for-  
46  
47 service payment in the Korean healthcare system.<sup>30</sup> This restriction may stunt proper IHD  
48  
49 management, especially among patients with lower education levels. Accordingly, our  
50  
51 findings suggest that individualized education could maximize management outcomes.  
52  
53  
54  
55  
56

1  
2  
3  
4 Our finding that the individual-level income status and proper IHD management were not  
5 associated may imply that economic barriers to care or drugs do not determine the proper  
6 management of this condition. However, previous studies have shown that economically  
7 disadvantaged patients might be more likely to decline follow-up procedures or prescribed  
8 medications because economic constraint.<sup>5 28</sup> Our favorable study finding of no significant  
9 income inequality might therefore be explained by the universal healthcare coverage benefits  
10 and medical subsidies provided to lower-income populations in Korea.<sup>30</sup>

11  
12  
13  
14  
15  
16  
17  
18  
19 Our study had several limitations of note. First, our cross-sectional study was unable to  
20 determine the causal relationship between our main exposures (e.g., individual- and  
21 neighborhood-level SES) and the self-reported management of IHD. Second, our study used  
22 self-reported survey data, which may have been biased by social desirability, and the patients'  
23 responses regarding IHD management may not have been confirmed by medical  
24 professionals. Third, selection bias may have been introduced by the deaths of disadvantaged  
25 individuals prior to the survey. However, this bias would have led to underestimation in our  
26 results. Fourth, the regions associated with the 17 participating general hospitals may not be  
27 the best proxy for the regions in which individual residents live, as we could not exclude the  
28 possibility that patients may have visited general hospitals in other communities to seek  
29 better-quality evaluations. Despite these limitations, however, one strength of our study was  
30 the use of population-based samples, which enabled a multi-level analysis based on the  
31 neighborhood-level SES. By contrast, most previous studies used hospital data, which  
32 frequently lack information about the individual's SES and neighborhood characteristics.<sup>31</sup>  
33  
34  
35  
36  
37  
38  
39  
40  
41  
42  
43  
44  
45  
46  
47  
48  
49  
50 Moreover, to the best of our knowledge, this is among the first studies to examine the  
51 association between individual- and neighborhood-level SES and IHD management in an  
52 Asian country.  
53  
54  
55  
56  
57  
58  
59  
60

1  
2  
3  
4 In conclusion, our study findings provide an opportunity to improve proper IHD management  
5  
6 by identifying the individual- and neighborhood-level factors associated with SES-related and  
7  
8 geographic inequalities in IHD mortality. Our results suggest that policies or interventions  
9  
10 intended to improve the quality and availability of medical resources in low-income areas  
11  
12 might also effectively reduce inequalities in management and, ultimately, mortality.  
13  
14 Moreover, our data suggest that patient-centered education is required to ensure proper post-  
15  
16 IHD management and reduce related mortality, particularly among patients with a low  
17  
18 education level.  
19  
20  
21  
22  
23  
24  
25  
26  
27  
28  
29  
30  
31  
32  
33  
34  
35  
36  
37  
38  
39  
40  
41  
42  
43  
44  
45  
46  
47  
48  
49  
50  
51  
52  
53  
54  
55  
56  
57  
58  
59  
60

### **Acknowledgments**

This work was supported by a Research Program funded by the Korea Centers for Disease Control and Prevention (2004-E71004-00, 2005-E71011-00, 2005-E71009-00, 2006-E71001-00, 2006-E71004-00, 2006-E71010-00, 2006-E71003-00, 2007-E71004-00, 2007-E71006-00, 2008-E71006-00, 2008-E71008-00, 2009-E71009-00, 2010-E71006-00, 2011-E71006-00, 2012-E71001-00, and 2013-E71009-00).

### **Author Contributions**

JH analyzed the data; drafted, reviewed, and edited the manuscript; and contributed to the discussion. JKL and DK conducted, designed, and supervised the study; reviewed and edited the manuscript; and contributed to the discussion. JO, HYL, JYC, SK, and SVS reviewed and edited the manuscript and contributed to the discussion.

### **Conflicts of Interest**

The authors declare no conflicts of interest.

### **A data sharing statement**

Data sharing of HEXA is available through the website of the Korea National Institute of Health ([http://www.nih.go.kr/NIH/cms/content/eng/03/65203\\_view.html#menu4\\_1\\_2](http://www.nih.go.kr/NIH/cms/content/eng/03/65203_view.html#menu4_1_2)).

## References

1. Yusuf S, Reddy S, Ôunpuu S, *et al.* Global burden of cardiovascular diseases. *Circulation* 2001;**104**:2855–64.
2. Fihn SD, Gardin JM, Abrams J, *et al.* 2012 ACCF/AHA/ACP/AATS/PCNA/SCAI/STS Guideline for the Diagnosis and Management of Patients With Stable Ischemic Heart Disease. *J Am Coll Cardiol* 2012;**24**:e44–164.
3. Fihn SD, Blankenship JC, Alexander KP, *et al.* 2014 ACC/AHA/AATS/PCNA/SCAI/STS focused update of the guideline for the diagnosis and management of patients with stable ischemic heart disease. *Circulation* 2014;**64**:1929–49.
4. Molshatzki N, Drory Y, Myers V, *et al.* Role of socioeconomic status measures in long-term mortality risk prediction after myocardial infarction. *Med Care* 2011;**49**:673–78.
5. Philbin EF, McCullough PA, DiSalvo TG, *et al.* Socioeconomic status is an important determinant of the use of invasive procedures after acute myocardial infarction in New York State. *Circulation* 2000;**102**:III107–15.
6. Goldman DP, Smith JP. Can patient self-management help explain the SES health gradient? *Proc Natl Acad Sci U S A* 2002;**99**:10929–34.
7. Lantz PM, Lynch JW, House JS, *et al.* Socioeconomic disparities in health change in a longitudinal study of US adults: the role of health-risk behaviors. *Soc Sci Med* 2001;**53**:29–40.
8. Steenland K, Henley J, Calle E, *et al.* Individual-and area-level socioeconomic status variables as predictors of mortality in a cohort of 179,383 persons. *Am J Epidemiol* 2004;**159**:1047–56.
9. Kawachi I, Berkman LF. *Neighborhoods and health.* Oxford University Press, 2003.
10. Sundquist K, Winkleby M, Ahlén H, *et al.* Neighborhood socioeconomic environment and incidence of coronary heart disease: a follow-up study of 25,319 women and men in Sweden. *Am J Epidemiol* 2004;**159**:655–62.
11. Merlo J, Ohlsson H, Chaix B, *et al.* Revisiting causal neighborhood effects on individual ischemic heart disease risk: a quasi-experimental multilevel analysis among Swedish siblings. *Soc Sci Med* 2013;**76**:39–46.
12. Foraker RE, Patel MD, Whitsel EA, *et al.* Neighborhood socioeconomic disparities and 1-year case fatality after incident myocardial infarction: The Atherosclerosis Risk in Communities (ARIC) Community Surveillance (1992-2002). *Am Heart J* 2013;**165**:102–07.
13. Chaix B, Rosvall M, Merlo J. Neighborhood socioeconomic deprivation and residential instability: effects on incidence of ischemic heart disease and survival after myocardial infarction. *Epidemiology* 2007;**18**:104–11.
14. OECD. *Health at a glance 2013: OECD indicators.* OECD publishing, 2013.



15. Suh I, Oh KW, Lee KH, *et al*. Moderate dietary fat consumption as a risk factor for ischemic heart disease in a population with a low fat intake: a case-control study in Korean men. *Am J Clin Nutr* 2001;**73**:722–27.
16. Kim Y, Han B-G; KoGES Group. Cohort Profile: The Korean Genome and Epidemiology Study (KoGES) Consortium. *Int J Epidemiol* 2017;**46**:e20.
17. Shin S, Lee H-W, Kim CE, *et al*. Egg consumption and risk of metabolic syndrome in Korean adults: Results from the Health Examinees Study. *Nutrients* 2017;**9**:687.
18. Leckie G, Charlton C. Runmlwin-a program to Run the MLwiN multilevel modelling software from within stata. *J Stat Softw* 2013;**52**:1–40.
19. Snijders TA. Multilevel analysis. International Encyclopedia of Statistical Science. Springer, 2011: pp. 879–82.
20. Maas CJ, Hox JJ. Sufficient sample sizes for multilevel modeling. *Methodology* 2005;**1**:86–92.
21. McNeish DM, Stapleton LM. The effect of small sample size on two-level model estimates: A review and illustration. *Educ Psychol Rev* 2016;**28**:295–314.
22. Kapral MK, Wang H, Mamdani M, *et al*. Effect of socioeconomic status on treatment and mortality after stroke. *Stroke* 2002;**33**:268–75.
23. Uchino BN. Social support and health: a review of physiological processes potentially underlying links to disease outcomes. *J Behav Med* 2006;**29**:377–87.
24. Sallis JF, Saelens BE, Frank LD, *et al*. Neighborhood built environment and income: examining multiple health outcomes. *Soc Sci Med* 2009;**68**:1285–93.
25. Mobley LR, Root ED, Finkelstein EA, *et al*. Environment, obesity, and cardiovascular disease risk in low-income women. *Am J Prev Med* 2006;**30**:327–32.
26. Cantrell J, Anesetti-Rothermel A, Pearson JL, *et al*. The impact of the tobacco retail outlet environment on adult cessation and differences by neighborhood poverty. *Addiction* 2015;**110**:152–61.
27. Bonaccio M, Bonanni AE, Di Castelnuovo A, *et al*. Low income is associated with poor adherence to a Mediterranean diet and a higher prevalence of obesity: cross-sectional results from the Moli-sani study. *BMJ Open* 2012;**2**:e001685.
28. Forsberg PO, Li XJ, Sundquist K. Neighborhood socioeconomic characteristics and statin medication in patients with myocardial infarction: a Swedish nationwide follow-up study. *BMC Cardiovasc Disord* 2016;**16**:8. doi: 10.1186/s12872-016-0319-y
29. Kalichman SC, Catz S, Ramachandran B. Barriers to HIV/AIDS treatment and treatment adherence among African-American adults with disadvantaged education. *J Natl Med Assoc* 1999;**91**:439.
30. Jones RS. Health-care reform in Korea. OECD Economic Department Working Papers. OECD, 2010: Vol. 797, 0\_1.

1  
2  
3  
4 31. Shen JJ, Wan T, Perlin JB. An exploration of the complex relationship of socioecologic factors in  
5 the treatment and outcomes of acute myocardial infarction in disadvantaged populations. *Health Serv*  
6 *Res* 2001;**36**:711.  
7  
8  
9  
10  
11  
12  
13  
14  
15  
16  
17  
18  
19  
20  
21  
22  
23  
24  
25  
26  
27  
28  
29  
30  
31  
32  
33  
34  
35  
36  
37  
38  
39  
40  
41  
42  
43  
44  
45  
46  
47  
48  
49  
50  
51  
52  
53  
54  
55  
56  
57  
58  
59  
60

For peer review only

Table 1. Characteristics of the study sample from the HEXA-Gem dataset (N = 2,909), stratified by self-reported management of post-ischemic heart disease

|                             |                       | Proper management<br>(N = 2,412) |      | Poor management<br>(N = 497) |      |   |
|-----------------------------|-----------------------|----------------------------------|------|------------------------------|------|---|
|                             |                       | N                                | (%)  | N                            | (%)  |   |
| Sex                         | Men                   | 1,306                            | 87.2 | 191                          | 12.8 | * |
|                             | Women                 | 1,106                            | 78.3 | 306                          | 21.7 |   |
| Age (years)                 | 40–49                 | 198                              | 71.5 | 79                           | 28.5 | * |
|                             | 50–59                 | 869                              | 82.0 | 191                          | 18.0 |   |
|                             | 60–69                 | 1,345                            | 85.6 | 227                          | 14.4 |   |
| Education                   | ≤Middle school        | 1,100                            | 85.7 | 183                          | 14.3 | * |
|                             | High school           | 818                              | 80.1 | 203                          | 19.9 |   |
|                             | ≥College              | 494                              | 81.7 | 111                          | 18.3 |   |
| Income (million Korean won) | <1                    | 439                              | 84.2 | 83                           | 15.8 | * |
|                             | 1–2                   | 677                              | 87.2 | 99                           | 12.8 |   |
|                             | 2–4                   | 879                              | 80.3 | 215                          | 19.7 |   |
|                             | ≥4                    | 417                              | 80.7 | 100                          | 19.3 |   |
| Marital status              | Living with spouse    | 2,135                            | 83.4 | 424                          | 16.6 | * |
|                             | Living without spouse | 277                              | 79.1 | 73                           | 20.9 |   |
| Occupation                  | White collar          | 685                              | 80.3 | 168                          | 19.7 | * |
|                             | Blue collar           | 425                              | 84.5 | 78                           | 15.5 |   |
|                             | Housewife             | 797                              | 80.8 | 189                          | 19.2 |   |
|                             | Other                 | 505                              | 89.1 | 62                           | 10.9 |   |

\* Differences between two groups for the all variables were considered significant at a p value <0.05.

Table 2. Estimations from the two-level multilevel logistic regression models of self-reported proper management among ischemic heart disease survivors in the HEXA-Gem dataset

|                                                     | Model 1    |                         |       | Model 2    |                         |        | Model 3    |                         |        |
|-----------------------------------------------------|------------|-------------------------|-------|------------|-------------------------|--------|------------|-------------------------|--------|
|                                                     | Odds Ratio | (95% Credible Interval) | p     | Odds Ratio | (95% Credible Interval) | p      | Odds Ratio | (95% Credible Interval) | p      |
| <i>Fixed Parameters</i>                             |            |                         |       |            |                         |        |            |                         |        |
| Sex (ref: Female)                                   |            |                         |       |            |                         |        |            |                         |        |
| Male                                                |            |                         |       | 2.90       | (2.12–3.93)             | <0.001 | 2.43       | (1.84–3.17)             | <0.001 |
| Age (years; ref: 40–49)                             |            |                         |       |            |                         |        |            |                         |        |
| 50–59                                               |            |                         |       | 1.83       | (1.30–2.55)             | <0.001 | 1.83       | (1.33–2.52)             | <0.001 |
| 61–69                                               |            |                         |       | 2.65       | (1.85–3.85)             | <0.001 | 2.64       | (1.87–3.74)             | <0.001 |
| Education (ref. ≤Middle school)                     |            |                         |       |            |                         |        |            |                         |        |
| High school                                         |            |                         |       | 1.48       | (1.20–1.52)             | <0.001 | 1.48       | (1.23–1.50)             | <0.001 |
| ≥College                                            |            |                         |       | 1.33       | (1.09–1.52)             | 0.006  | 1.42       | (1.06–1.50)             | 0.009  |
| Income (ref: <1 million Korean won)                 |            |                         |       |            |                         |        |            |                         |        |
| 1–2 million                                         |            |                         |       | 1.28       | (0.91–1.74)             | 0.081  | 1.27       | (0.93–1.75)             | 0.134  |
| 2–4 million                                         |            |                         |       | 1.03       | (0.68–1.49)             | 0.475  | 1.02       | (0.69–1.50)             | 0.931  |
| ≥4 million                                          |            |                         |       | 1.00       | (0.66–1.46)             | 0.455  | 0.96       | (0.65–1.42)             | 0.840  |
| Marital status (ref. Living with spouse)            |            |                         |       |            |                         |        |            |                         |        |
| Living without spouse                               |            |                         |       | 0.94       | (0.64–1.32)             | 0.342  | 0.94       | (0.68–1.29)             | 0.300  |
| Occupation (ref. White collar)                      |            |                         |       |            |                         |        |            |                         |        |
| Blue collar                                         |            |                         |       | 1.01       | (0.72–1.39)             | 0.487  | 0.87       | (0.65–1.17)             | 0.167  |
| Housewife                                           |            |                         |       | 1.50       | (1.08–2.02)             | 0.009  | 1.21       | (0.94–1.55)             | 0.088  |
| Other                                               |            |                         |       | 1.12       | (0.77–1.54)             | 0.294  | 1.16       | (0.83–1.56)             | 0.204  |
| Neighborhood-level income quartile                  | 1.74       | (1.04–2.64)             | 0.016 |            |                         |        | 1.25       | (1.03–1.47)             | 0.012  |
| Neighborhood-level % of college graduates or higher | 1.60       | (1.05–2.44)             | 0.030 |            |                         |        | 1.08       | (0.87–1.33)             | 0.550  |
| <i>Random Parameters</i>                            |            |                         |       |            |                         |        |            |                         |        |
| Between-neighborhood variance                       | 0.39       | (0.16–0.78)             |       | 0.37       | (0.16–0.72)             |        | 0.27       | (0.11–0.52)             |        |
| DIC                                                 | 2597.31    |                         |       | 2491.14    |                         |        | 2489.83    |                         |        |

Note: Model 1 included the neighborhood-level SES only; model 2 included individual-level factors only; model 3 included all individual- and neighborhood-level factors.

1  
2  
3  
4  
5  
6  
7  
8  
9  
10  
11  
12  
13  
14  
15  
16  
17  
18  
19  
20  
21  
22  
23  
24  
25  
26  
27  
28  
29  
30  
31  
32  
33  
34  
35  
36  
37  
38  
39  
40  
41  
42  
43  
44  
45  
46  
47  
48  
49  
50  
51  
52  
53  
54  
55  
56  
57  
58  
59  
60

Figure 1. Predicted probabilities of the self-reported proper management of ischemic heart disease across individual-level income groups and neighborhood-level income quartiles, using the HEXA-Gem dataset

Note: Individual income is shown in million (M) Korean won.

For peer review only

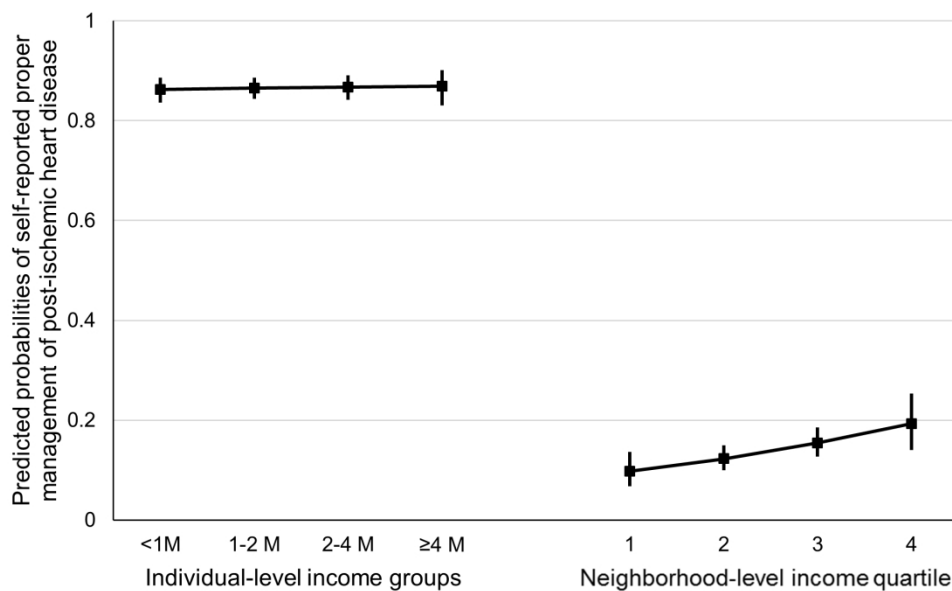

Figure 1. Predicted probabilities of the self-reported proper management of ischemic heart disease across individual-level income groups and neighborhood-level income quartiles, using the HEXA-Gem dataset

Note: Individual income is shown in million (M) Korean won.

180x119mm (300 x 300 DPI)

# BMJ Open

## Neighborhood- and Individual-level Socioeconomic Status and Self-reported Management of Ischemic Heart Disease: Cross-sectional Results from the Korea Health Examinees Study

|                                 |                                                                                                                                                                                                                                                                                                                                                                                                                                                                                                                                                                                                                                                                                                                                                                                              |
|---------------------------------|----------------------------------------------------------------------------------------------------------------------------------------------------------------------------------------------------------------------------------------------------------------------------------------------------------------------------------------------------------------------------------------------------------------------------------------------------------------------------------------------------------------------------------------------------------------------------------------------------------------------------------------------------------------------------------------------------------------------------------------------------------------------------------------------|
| Journal:                        | <i>BMJ Open</i>                                                                                                                                                                                                                                                                                                                                                                                                                                                                                                                                                                                                                                                                                                                                                                              |
| Manuscript ID                   | bmjopen-2018-021577.R1                                                                                                                                                                                                                                                                                                                                                                                                                                                                                                                                                                                                                                                                                                                                                                       |
| Article Type:                   | Research                                                                                                                                                                                                                                                                                                                                                                                                                                                                                                                                                                                                                                                                                                                                                                                     |
| Date Submitted by the Author:   | 15-Apr-2018                                                                                                                                                                                                                                                                                                                                                                                                                                                                                                                                                                                                                                                                                                                                                                                  |
| Complete List of Authors:       | Heo, Jongho; Seoul National University College of Medicine, JW Lee Center for Global Medicine<br>Oh, Juhwan; Seoul National University College of Medicine, JW Lee Center for Global Medicine<br>Lee, Hwa-Young; Seoul National University College of Medicine, JW LEE Center for Global Medicine<br>Choi, Ji-Yeob; Seoul National University College of Medicine, Kim, Sujin; Korea Institute for Health and Social Affairs<br>Subramanian, S V; Harvard School of Public Health, Department of Society, Human Development and<br>Lee, Jong-Koo; Seoul National University College of Medicine, Department of Family Medicine; Seoul National University Hospital, Policy and Development<br>Kang, Daehee; College of Medicine Seoul National University, Department of Preventive Medicine |
| <b>Primary Subject Heading</b>: | Cardiovascular medicine                                                                                                                                                                                                                                                                                                                                                                                                                                                                                                                                                                                                                                                                                                                                                                      |
| Secondary Subject Heading:      | Epidemiology, Public health                                                                                                                                                                                                                                                                                                                                                                                                                                                                                                                                                                                                                                                                                                                                                                  |
| Keywords:                       | angina, myocardial infraction, multilevel analysis, MCMC, SES, Korea                                                                                                                                                                                                                                                                                                                                                                                                                                                                                                                                                                                                                                                                                                                         |
|                                 |                                                                                                                                                                                                                                                                                                                                                                                                                                                                                                                                                                                                                                                                                                                                                                                              |

SCHOLARONE™  
Manuscripts

# Neighborhood- and Individual-level Socioeconomic Status and Self-reported Management of Ischemic Heart Disease: Cross-sectional Results from the Korea Health Examinees Study

Jongho Heo<sup>1</sup>, Juhwan Oh<sup>1</sup>, Hwa-Young Lee<sup>1</sup>, Ji-Yeob Choi<sup>2,3,4</sup>, Sujin Kim<sup>5,6</sup>, SV Subramanian<sup>7</sup>, Jong-Koo Lee<sup>\*1,8</sup>, and Daehee Kang<sup>\*2,3,4,9</sup>

<sup>1</sup>JW Lee Center for Global Medicine, Seoul National University College of Medicine, Seoul, Korea; <sup>2</sup>Department of Biomedical Sciences, Seoul National University Graduate School, Seoul, Korea; <sup>3</sup>Department of Preventive Medicine, Seoul National University College of Medicine, Seoul, Korea; <sup>4</sup>Cancer Research Institute, Seoul National University, Seoul, Korea; <sup>5</sup>Institute for Health and Environment, Seoul National University, Seoul, Korea; <sup>6</sup>Korea Institute for Health and Social Affairs, Sejong-si, South Korea; <sup>7</sup>Department of Social and Behavioral Science, Harvard School of Public Health, Boston, MA, USA; <sup>8</sup>Department of Family Medicine, Seoul National University College of Medicine, Seoul, Korea; <sup>9</sup>Institute of Environmental Medicine, Seoul National University Medical Research Center, Seoul, Korea

**\*JL and DK contributed equally to this paper as corresponding authors.**

**Corresponding author:**

**Jong-Koo Lee**

JW Lee Center for Global Medicine  
Seoul National University College of Medicine  
Tel: +82-2-740-8922/ Fax: +82-2-766-1185  
E-mail: docmohw@snu.ac.kr

Main text word count: 2,533

Abstract word count: 248



# Neighborhood- and Individual-level Socioeconomic Status and Self-reported Management of Ischemic Heart Disease: Cross-sectional Results from the Korea Health Examinees Study

## Abstract

**Objective:** Several studies identified neighborhood context as a predictor of prognosis in ischemic heart disease (IHD). The present study investigates the relationships of neighborhood- and individual-level socioeconomic status (SES) with the odds of ongoing management of IHD, using baseline survey data from the Korea Health Examinees-Gem study.

**Design:** In this cross-sectional study, we estimated the association of the odds of self-reported ongoing management with the neighborhood-level income status and percentage of college graduates after controlling for individual-level covariates using two-level multilevel logistic regression models based on the Markov Chain Monte Carlo function.

**Setting:** A survey conducted at 17 large general hospitals in major Korean cities and metropolitan areas during 2005–2013.

**Participants:** 2,931 adult men and women.

**Outcome measure:** The self-reported status of management after incident angina or myocardial infarction.

**Results:** At the neighborhood level, residence in a higher-income neighborhood was associated with the self-reported ongoing management of IHD, after controlling for individual-level covariates [odds ratio (OR): 1.24, 95% credible interval (CI): 1.03–1.46]. At the individual level, higher education was associated with the ongoing IHD management (high school graduation, OR: 1.46, 95% CI: 1.12–1.88); college or higher, OR: 2.05, 95% CI: 1.42–2.90; reference, middle school graduation or below).

**Conclusions:** Our study suggests that policies or interventions aimed at improving the quality and availability of medical resources in low-income areas may associate with ongoing IHD management. Moreover, patient-centered education is essential for ongoing IHD management, especially when targeted to IHD patients with a low education level.

**Keywords:** angina, myocardial infarction, multilevel analysis, MCMC, SES, Korea

### Strengths and Limitations of this Study

- This study is among the first to examine the association between neighborhood- and individual-level SES and ongoing management of ischemic heart disease in Asian countries.
- Our study benefitted from the use of population-based samples, which enabled a multi-level analysis based on the neighborhood-level socioeconomic status.
- However, our findings were limited by the cross-sectional study design, use of survey data, and risk of selection bias.

## INTRODUCTION

Ischemic heart disease (IHD), the current leading cause of death in Western countries, is rapidly becoming the leading cause of death in developing countries.<sup>1</sup> To reduce the mortality associated with IHD, researchers and clinicians have stressed the importance of patient management. Based on evidence demonstrating that medication adherence and behavioral lifestyle changes improved prognosis and retarded disease progression, guidelines for secondary IHD prevention suggest that patient management should comprise pharmacologic treatments (e.g., antiplatelet therapy, beta-blocker therapy) or lifestyle modifications (e.g., weight control, smoking cessation, blood pressure management).<sup>2,3</sup>

Earlier research suggests that the management of post-IHD may differ by socioeconomic status (SES). Notably, the lower rates of mortality among IHD patients with a high SES<sup>4</sup> may be attributable to the availability of better care,<sup>5</sup> better adherence to therapy, better self-monitoring,<sup>6</sup> and more rapid implementation of behavioral lifestyle changes,<sup>7</sup> which are facilitated by economic, educational, and social resources. Independent of the individual-level SES, neighborhood contexts also play critical roles in various health outcomes, including IHD-related outcomes.<sup>8,9</sup> Several previous studies have shown that residence in a socioeconomically disadvantaged neighborhoods was associated with a greater risk of IHD<sup>10</sup> and shorter survival duration.<sup>12,13</sup> However, few studies have examined the association between the neighborhood SES and IHD management.

To our knowledge, no study has addressed this association in South Korea (hereafter Korea) or another Asian country. Although the IHD-related mortality rate in 2011 remained lower in Korea (42 per 100,000 individuals) than in Western countries, the incidence of IHD in Korea has increased by 60% during the past decade<sup>14</sup> consequent to increases in body mass index values and an increasingly westernized diet among middle-aged adults.<sup>15</sup> Secondary IHD

1  
2  
3  
4 mortality may be significantly reduced by ongoing IHD management involving both proper  
5  
6 quality treatment and lifestyle modification, which may be shaped by neighborhood contexts  
7  
8 as well as individual characteristics. Therefore, this study aimed to evaluate the individual-  
9  
10 and neighborhood-level SES as the main determinants of ongoing IHD management in Korea,  
11  
12 using baseline data from a large population-based cohort study with a multi-level framework.  
13  
14  
15

## 16 17 18 **METHODS**

### 19 20 21 **Data source**

22  
23  
24 We used baseline survey data from the Health Examinees-Gem (HEXA\_G) study, which was  
25  
26 constructed by dropping inconsistent data collected during pilot HEXA survey periods. The  
27  
28 original HEXA, which is part of the Korean Genome Epidemiology Study (KoGES),<sup>16</sup> was a  
29  
30 large-scale genomic cohort study of 169,722 adults aged 40–69 years living in major Korean  
31  
32 cities and metropolitan areas. Samples were recruited from 38 health examination centers and  
33  
34 training hospitals (mainly general hospitals) during 2004–2013.<sup>17</sup> Eligible participants who  
35  
36 visited the participating sites for biannual health check-ups, which were covered in full by the  
37  
38 National Health Insurance Program were asked to respond voluntarily to an interview-based  
39  
40 survey conducted by well-trained interviewers using a structured questionnaire. The survey  
41  
42 collected information about socio-demographic characteristics, medical history, medication  
43  
44 usage, family history, and health/lifestyle behaviors. More detailed information about the  
45  
46 HEXA cohort study can be found elsewhere.<sup>16 17</sup>  
47  
48  
49

50  
51 The HEXA-G dataset comprised 139,345 participants [men: 46,977 (33.7%); women: 92,368  
52  
53 (66.3%)]. Participants were excluded because of inconsistencies in data quality control, bio-  
54  
55 specimen collection, a short duration of study participation at 21 centers that participated in a  
56  
57

1  
2  
3  
4 pilot study, or the withdrawal of provision of personal information for studies. All  
5  
6 participants completed a consent form before responding to the survey. The study was  
7  
8 approved by the Institutional Review Board (IRB) of Seoul National University Hospital,  
9  
10 Seoul, Korea (IRB No. 0608-018-179).  
11  
12  
13  
14  
15

### 16 **Study outcome**

17  
18 The outcome of the study was the self-reported current management status after incident  
19  
20 angina or myocardial infarction. To identify participants with a history of IHD, the survey  
21  
22 included the yes/no question of “Have you ever been diagnosed with angina or myocardial  
23  
24 infarction by a medical doctor in a medical facility?” The sub-population that responded “yes”  
25  
26 then answered a sub-question regarding the current status of disease management for which  
27  
28 the following options were available: (a) “condition has been good or improved due to  
29  
30 management”; (b) “currently managed and treated”; (c) “was previously managed but is now  
31  
32 neglected”; and (d) “neither managed nor treated.” We dichotomized these responses as  
33  
34 “ongoing management” by combining (a) with (b) versus “failure of ongoing management”  
35  
36 (reference) by combining (c) with (d), respectively.  
37  
38  
39  
40  
41  
42  
43

### 44 **Neighborhood-level SES variables**

45  
46 The main neighborhood-level SES variables were (1) the regional median income status and  
47  
48 (2) the regional mean percentage of college graduates. Seventeen neighborhoods were  
49  
50 defined as 17 major cities and metropolitan areas (mean population: 201,210, range: 115,000-  
51  
52 574,000) associated with 17 large general hospitals (Figure 1). The total catchment area of  
53  
54 these hospitals covered 6.6% of the total Korean population. We obtained neighborhood-level  
55  
56  
57  
58  
59  
60

1  
2  
3  
4 SES data from a nationally and regionally representative dataset, Korea Community Health  
5  
6 Survey (<https://chs.cdc.go.kr/chs/index.do>), which has been conducted in 253 communities  
7  
8 annually since 2008. This survey aims to estimate regional patterns of disease prevalence and  
9  
10 morbidity, as well as to understand the personal lifestyle and health behavior.<sup>18</sup> An average of  
11  
12 800-900 adults (age:  $\geq 19$  years) who resided in each neighborhood were selected using the  
13  
14 probability proportional to sampling and systematic sampling methods. The sampling  
15  
16 strategies are described in more detail elsewhere.<sup>18</sup> We calculated exogenous neighborhood-  
17  
18 level SES measures using regional mean centering of the percentage of college graduates and  
19  
20 median centering of the income status of the survey years. We then linked the regional SES  
21  
22 indicators to our main dataset using the neighborhood identifier and the year variable. A  
23  
24 comparison of socio-demographic characteristics between neighborhoods included and not  
25  
26 included in the study revealed that the former was comprised of younger (age: 49.2 vs. 52.9  
27  
28 years), more highly educated (college graduates: 43.9% vs. 33.0%), and wealthier (the top 25%  
29  
30 of household incomes: 30.9% vs. 27.8%) population.  
31  
32  
33  
34  
35  
36  
37

### 38 **Individual-level SES variables**

39  
40 Educational level was categorized into middle school or lower, high school graduation, or  
41  
42 college graduation or higher. Income was measured by collapsing the data into four  
43  
44 categories: <1, 1-2, 2-4, and  $\geq 4$  million Korean won (M KRW).  
45  
46  
47  
48  
49  
50

### 51 **Covariates**

1  
2  
3  
4 The individual-level covariates included sex, age, marital status occupation, and  
5  
6 comorbidities. Age was categorized into 40–50, 51–60, or 61+ years. Marital status was  
7  
8 dichotomized into living with a spouse or not. Occupation was categorized as white collar,  
9  
10 blue collar, housewife, or other. Comorbidities were defined as the presence of hypertension,  
11  
12 diabetes, or hyperlipidemia at the time of the survey.  
13  
14

### 15 16 17 18 **Statistical analysis**

19  
20  
21 Two-level multilevel logistic regression models were fitted with individuals (level 1) nested  
22  
23 within neighborhoods (level 2) to estimate the contributions of the individual- and  
24  
25 neighborhood-level factors simultaneously. Random intercept models were fitted for the  
26  
27 whole study samples to correct for cluster effects of the individual variables within the same  
28  
29 neighborhood according to the neighborhood identifier in the model. We used the command  
30  
31 *runmlwin* to run *MLwiN* within Stata software (Stata Corp. College Station, TX, USA).<sup>19</sup> This  
32  
33 command enables researchers to fit multilevel models more quickly with *MLwiN* by taking  
34  
35 advantage of the multi-level dataset analysis features included in Stata.<sup>19</sup> *MLwiN* was used to  
36  
37 fit a binomial logit response model to an estimation using the Iterative Generalized Least  
38  
39 Squares (IGLS) and second-order penalized quasi-likelihood (PQL2).  
40  
41  
42

43 Estimates obtained using the above-described methods are known to exhibit a bias for  
44  
45 discrete responses;<sup>20</sup> therefore, we fitted our final model using the Markov chain Monte Carlo  
46  
47 (MCMC) function. Additionally, we adopted the Bayesian estimation function to ensure the  
48  
49 accuracy of the estimates and their standard errors, as a small sample size at level two can  
50  
51 lead to biased estimates.<sup>21 22</sup> The MCMC was conducted to burn-in for 500 simulations,  
52  
53 which yielded distribution starting values to discard, and subsequently to proceed for 5,000  
54  
55 additional simulations to obtain a precise estimate and distribution of interest. Once the  
56  
57

1  
2  
3  
4 convergence diagnostics were confirmed, the odds ratios (ORs) and 95% credible intervals  
5  
6 (CIs) were presented in a Bayesian framework. We created separate missing dummy  
7  
8 categories to retain the missing cases in income (n=295), occupation (n=265), and other  
9  
10 covariate data (n=35) in the regression analysis. Due to of little interpretive value, the results  
11  
12 for the category were not reported. We did not stratify the analyses by gender because a  
13  
14 Chow test [47] failed to detect significant differences in the slopes and intercepts of the  
15  
16 gender-stratified regressions [F (1, 2,364) =0.95, P=0.3309].  
17  
18  
19  
20  
21

## 22 RESULTS

23  
24  
25 Table 1 presents the characteristics of participants with IHD from the HEXA-Gem dataset (n  
26  
27 = 2,932), stratified by self-reported IHD management. Men had higher proportions of self-  
28  
29 reported ongoing management than women (89.0% vs. 79.7%). Participants of younger  
30  
31 groups had higher proportions of failures of ongoing IHD management (40–49: 28.7% vs.  
32  
33 50–59: 16.5% vs. 60–69: 11.7%).  
34  
35  
36

37 Table 2 presents the results of the two-level multilevel logistic regression models for ongoing  
38  
39 IHD management. In Model 1, the odds of ongoing management were higher for those with  
40  
41 IHD who resided in higher-income neighborhoods, with an OR of 1.24 (95% CI: 1.01–1.52).  
42  
43 In Model 2, a higher individual education level was associated with ongoing IHD  
44  
45 management, with ORs of 1.46 (95% CI: 1.11–1.87) and 2.33 (95% CI: 1.59–3.20) for high  
46  
47 school graduation and college graduation or higher, respectively, compared to those with a  
48  
49 middle school or lower education. However, no significant associations were observed  
50  
51 between an individual's income group and the likelihood of self-reported ongoing  
52  
53 management. In Model 3, the neighborhood-level income status remained significantly  
54  
55  
56  
57  
58  
59  
60



1  
2  
3  
4 associated with self-reported ongoing management even after adjusting for individual-level  
5 factors (OR: 1.24, 95% CI 1.03–1.46). In this model, however, the association of residence in  
6 a neighborhood with a high percentage of college graduates with self-reported ongoing IHD  
7 management was not statistically significant. Finally, all models exhibited significant  
8 between-neighborhood variance.  
9  
10  
11  
12  
13  
14  
15  
16  
17

## 18 **DISCUSSION**

19  
20  
21 According to our findings, residence in a neighborhood with a one-unit higher income was  
22 associated with a 24% higher likelihood of self-reported ongoing IHD management,  
23 compared to residence in a neighborhood with a lower income status. By contrast, at the  
24 individual level, a higher income was not significantly associated with self-reported ongoing  
25 IHD management. However, a higher individual education level was associated with a higher  
26 likelihood of self-reported ongoing IHD management.  
27  
28  
29  
30  
31  
32  
33

34  
35 Previous studies have found that a lower neighborhood SES was associated with a higher risk  
36 of IHD<sup>10 11</sup> and a shorter survival duration after incident IHD.<sup>12 13</sup> Consistent with those  
37 reports, our study showed an association of the neighborhood SES with ongoing IHD  
38 management that was independent of individual-level factors. We attribute this association to  
39 several factors. First, residents of higher-income neighborhoods may have greater access to  
40 higher quality medical resources, such as physicians or primary care clinics near their homes,  
41 regardless of individual income.<sup>23</sup> Second, residents in higher-income neighborhoods may  
42 enjoy a more favorable social environment for IHD management, which might include an  
43 increased interest in health maintenance and a greater amount of social support from  
44 neighbors.<sup>24</sup> Third, residents of lower-income neighborhoods might have reduced access to  
45  
46  
47  
48  
49  
50  
51  
52  
53  
54  
55  
56  
57  
58  
59  
60

1  
2  
3  
4 health-oriented features such as recreation spaces and walkable environments<sup>25</sup> and stores  
5 that sell healthy foods,<sup>26</sup> concomitant with increased access to stores selling cigarettes and/or  
6 alcohol<sup>27</sup> and exposure to other environmental stressors. These factors may have important  
7  
8 implications for self-care practices.  
9  
10

11  
12  
13 At the individual SES level, our study found that the education level was significantly  
14 associated with ongoing IHD management, whereas the income status was not. Similarly,  
15 previous studies also reported that IHD management may vary according to an individual's  
16 SES, and suggested that the survivors with lower income and education levels might fail to  
17 manage themselves appropriately because of (a) a lack of knowledge related to prevention  
18 and healthy habits,<sup>28</sup> (b) limited access to care or drugs due to economic constraints,<sup>29</sup> and (c)  
19 a lack of willingness or resources to change their lifestyles.<sup>7</sup> Patient education has been  
20 identified as an important factor in terms of the understanding of a specific disease process,  
21 medication management and adherence, and reported efficacies and side effects.<sup>3</sup> Previous  
22 studies demonstrated improved adherence to suggested management among IHD patients  
23 with higher education levels,<sup>30</sup> whereas patients with lower education levels may not adhere  
24 to guidelines because of a lack of knowledge or understanding about their disease.  
25  
26

27  
28 Alternatively, our study findings may reflect sub-optimal doctor-patient communication due  
29 to the exceptionally short consultation times with physicians in Korea, which are generally  
30 restricted to 2–3 minutes because of the lack of physicians and fee-for-service payment in the  
31 Korean healthcare system.<sup>31</sup> This restriction may stunt ongoing IHD management, especially  
32 among patients with lower education levels. Accordingly, our findings suggest that  
33 individualized education could maximize IHD management outcomes.  
34  
35

36  
37  
38 Our finding that the individual-level income status and ongoing IHD management were not  
39 associated may imply that economic barriers to care or drugs do not determine the ongoing  
40  
41  
42  
43  
44  
45  
46  
47  
48  
49  
50  
51

1  
2  
3  
4 management of this condition. However, previous studies have shown that economically  
5  
6 disadvantaged patients might be more likely to decline follow-up procedures or prescribed  
7  
8 medications because economic constraint.<sup>5,29</sup> Our favorable study finding of no significant  
9  
10 income inequality might therefore be explained by the universal healthcare coverage benefits  
11  
12 and medical subsidies provided to lower-income populations in Korea.<sup>31</sup>  
13

14  
15 Our study had several limitations of note. First, our cross-sectional study was unable to  
16  
17 determine the causal relationship between our main exposures (e.g., individual- and  
18  
19 neighborhood-level SES) and the self-reported management of IHD. Second, our study used  
20  
21 self-reported survey data, which may have been biased by misclassification due to  
22  
23 participants' misunderstanding or social desirability. Additionally, the participants' responses  
24  
25 regarding ongoing IHD management may not have been confirmed by medical professionals  
26  
27 whether the received treatment or participants' adherence to therapy was clinically  
28  
29 appropriate. Third, we were not able to control for severity of IHD and time lapsed the acute  
30  
31 event because of data limitations. Fourth, selection bias may have been introduced by non-  
32  
33 random survey participation and attrition. Disadvantaged individuals were less likely to  
34  
35 participate regular health examinations and were more likely to drop out in the survey,  
36  
37 possibly due to a failure of ongoing management. This bias would have led to  
38  
39 underestimating the likelihood of failure of ongoing management among disadvantaged  
40  
41 individuals. Fifth, we assumed that most participants visited the general hospitals within the  
42  
43 region they lived. This assumption is highly plausible, given the improved accessibility to the  
44  
45 health examination service in Korea contexts, as the National Health Insurance Program  
46  
47 provides free regular health examinations and medical facilities within and between regions  
48  
49 exhibit minimal variations in examination quality.<sup>32</sup> However, we could not completely  
50  
51 exclude the possibility that participants may have visited general hospitals in other  
52  
53  
54  
55  
56  
57  
58  
59  
60

1  
2  
3  
4 neighborhoods to seek better-quality evaluations. Despite these limitations, however, one  
5  
6 strength of our study was the use of population-based samples, which enabled a multi-level  
7  
8 analysis by linking neighborhood-level SES from the nationally and regionally representative  
9  
10 dataset. By contrast, most previous studies used hospital data, which frequently lack  
11  
12 information about the individual's SES and neighborhood characteristics.<sup>33</sup> Moreover, to the  
13  
14 best of our knowledge, this is among the first studies to examine the association between  
15  
16 individual- and neighborhood-level SES and IHD management in an Asian country.

17  
18  
19 In conclusion, our study findings provide an opportunity to improve ongoing IHD  
20  
21 management by identifying the neighborhood- and individual-level factors, which are  
22  
23 associated with SES-related and geographic inequalities in IHD mortality. Our results suggest  
24  
25 that policies or interventions intended to improve the quality and availability of medical  
26  
27 resources in low-income areas might also effectively reduce inequalities in management and,  
28  
29 ultimately, mortality. Moreover, our data suggest that patient-centered education is required  
30  
31 to ensure ongoing IHD management and reduce related mortality, particularly among patients  
32  
33 with a low education level.  
34  
35  
36  
37  
38  
39  
40  
41  
42  
43  
44  
45  
46  
47  
48  
49  
50  
51  
52  
53  
54  
55  
56  
57  
58  
59  
60

## Acknowledgments

This work was supported by a Research Program funded by the Korea Centers for Disease Control and Prevention (2004-E71004-00, 2005-E71011-00, 2005-E71009-00, 2006-E71001-00, 2006-E71004-00, 2006-E71010-00, 2006-E71003-00, 2007-E71004-00, 2007-E71006-00, 2008-E71006-00, 2008-E71008-00, 2009-E71009-00, 2010-E71006-00, 2011-E71006-00, 2012-E71001-00, and 2013-E71009-00).

## Author Contributions

JH analyzed the data; drafted, reviewed, and edited the manuscript; and contributed to the discussion. JKL and DK conducted, designed, and supervised the study; reviewed and edited the manuscript; and contributed to the discussion. JO, HYL, JYC, SK, and SVS reviewed and edited the manuscript and contributed to the discussion.

## Conflicts of Interest

The authors declare no conflicts of interest.

## A data sharing statement

Data sharing of HEXA is available through the website of the Korea National Institute of Health ([http://www.nih.go.kr/NIH/cms/content/eng/03/65203\\_view.html#menu4\\_1\\_2](http://www.nih.go.kr/NIH/cms/content/eng/03/65203_view.html#menu4_1_2)).

## References

1. Yusuf S, Reddy S, Ôunpûu S, et al. Global burden of cardiovascular diseases. *Circulation* 2001;104(23):2855-64.
2. Fihn SD, Gardin JM, Abrams J, et al. 2012 ACCF/AHA/ACP/AATS/PCNA/SCAI/STS Guideline for the Diagnosis and Management of Patients With Stable Ischemic Heart Disease. *Journal of the American College of Cardiology* 2012;24(60):e44-e164.
3. Fihn SD, Blankenship JC, Alexander KP, et al. 2014 ACC/AHA/AATS/PCNA/SCAI/STS focused update of the guideline for the diagnosis and management of patients with stable ischemic heart disease. *Circulation* 2014;CIR. 0000000000000095.
4. Molshatzki N, Drory Y, Myers V, et al. Role of socioeconomic status measures in long-term mortality risk prediction after myocardial infarction. *Medical care* 2011;49(7):673-78.
5. Philbin EF, McCullough PA, DiSalvo TG, et al. Socioeconomic status is an important determinant of the use of invasive procedures after acute myocardial infarction in New York State. *Circulation* 2000;102(19 Suppl 3):III107-III15.
6. Goldman DP, Smith JP. Can patient self-management help explain the SES health gradient? *Proceedings of the National Academy of Sciences* 2002;99(16):10929-34.
7. Lantz PM, Lynch JW, House JS, et al. Socioeconomic disparities in health change in a longitudinal study of US adults: the role of health-risk behaviors. *Social science & medicine* 2001;53(1):29-40.
8. Steenland K, Henley J, Calle E, et al. Individual-and area-level socioeconomic status variables as predictors of mortality in a cohort of 179,383 persons. *American journal of epidemiology* 2004;159(11):1047-56.
9. Kawachi I, Berkman LF. Neighborhoods and health: Oxford University Press 2003.
10. Sundquist K, Winkleby M, Ahlén H, et al. Neighborhood socioeconomic environment and incidence of coronary heart disease: a follow-up study of 25,319 women and men in Sweden. *American journal of epidemiology* 2004;159(7):655-62.
11. Merlo J, Ohlsson H, Chaix B, et al. Revisiting causal neighborhood effects on individual ischemic heart disease risk: a quasi-experimental multilevel analysis among Swedish siblings. *Social science & medicine* 2013;76:39-46.
12. Foraker RE, Patel MD, Whitsel EA, et al. Neighborhood socioeconomic disparities and 1-year case fatality after incident myocardial infarction: The Atherosclerosis Risk in Communities (ARIC) Community Surveillance (1992-2002). *American heart journal* 2013;165(1):102-07.
13. Chaix B, Rosvall M, Merlo J. Neighborhood socioeconomic deprivation and residential instability: effects on incidence of ischemic heart disease and survival after myocardial infarction. *Epidemiology* 2007;18(1):104-11.
14. OECD. Health at a glance 2013: OECD indicators: OECD publishing 2013.
15. Suh I, Oh KW, Lee KH, et al. Moderate dietary fat consumption as a risk factor for ischemic

- heart disease in a population with a low fat intake: a case-control study in Korean men. *The American journal of clinical nutrition* 2001;73(4):722-27.
16. Kim Y, Han B-G. Cohort Profile: The Korean Genome and Epidemiology Study (KoGES) Consortium. *International journal of epidemiology* 2016:dyy316.
17. Shin S, Lee H-W, Kim CE, et al. Egg Consumption and Risk of Metabolic Syndrome in Korean Adults: Results from the Health Examinees Study. *Nutrients* 2017;9(7):687.
18. Kang YW, Ko YS, Kim YJ, et al. Korea community health survey data profiles. *Osong public health and research perspectives* 2015;6(3):211-17.
19. Leckie G, Charlton C. Runmlwin-a program to Run the MLwiN multilevel modelling software from within stata. *Journal of Statistical Software* 2013;52(11):1-40.
20. Snijders TA. Multilevel analysis. *International Encyclopedia of Statistical Science*: Springer 2011:879-82.
21. Maas CJ, Hox JJ. Sufficient sample sizes for multilevel modeling. *Methodology* 2005;1(3):86-92.
22. McNeish DM, Stapleton LM. The effect of small sample size on two-level model estimates: A review and illustration. *Educational Psychology Review* 2016;28(2):295-314.
23. Kapral MK, Wang H, Mamdani M, et al. Effect of socioeconomic status on treatment and mortality after stroke. *Stroke* 2002;33(1):268-75.
24. Uchino BN. Social support and health: a review of physiological processes potentially underlying links to disease outcomes. *Journal of behavioral medicine* 2006;29(4):377-87.
25. Sallis JF, Saelens BE, Frank LD, et al. Neighborhood built environment and income: examining multiple health outcomes. *Social science & medicine* 2009;68(7):1285-93.
26. Mobley LR, Root ED, Finkelstein EA, et al. Environment, obesity, and cardiovascular disease risk in low-income women. *American journal of preventive medicine* 2006;30(4):327-32. e1.
27. Cantrell J, Anesetti-Rothermel A, Pearson JL, et al. The impact of the tobacco retail outlet environment on adult cessation and differences by neighborhood poverty. *Addiction* 2015;110(1):152-61.
28. Bonaccio M, Bonanni AE, Di Castelnuovo A, et al. Low income is associated with poor adherence to a Mediterranean diet and a higher prevalence of obesity: cross-sectional results from the Moli-sani study. *BMJ open* 2012;2(6):e001685.
29. Forsberg PO, Li XJ, Sundquist K. Neighborhood socioeconomic characteristics and statin medication in patients with myocardial infarction: a Swedish nationwide follow-up study. *BMC Cardiovasc Disord* 2016;16:8. doi: 10.1186/s12872-016-0319-y
30. Kalichman SC, Catz S, Ramachandran B. Barriers to HIV/AIDS treatment and treatment adherence among African-American adults with disadvantaged education. *Journal of the National Medical Association* 1999;91(8):439.
31. Jones RS. Health-care reform in Korea. *OECD Economic Department Working Papers* 2010(797):0\_1.
32. Cho B, Lee CM. Current situation of national health screening systems in Korea. *J Korean Med Assoc* 2011;54(7):666-69.

1  
2  
3  
4  
5  
6  
7  
8  
9  
10  
11  
12  
13  
14  
15  
16  
17  
18  
19  
20  
21  
22  
23  
24  
25  
26  
27  
28  
29  
30  
31  
32  
33  
34  
35  
36  
37  
38  
39  
40  
41  
42  
43  
44  
45  
46  
47  
48  
49  
50  
51  
52  
53  
54  
55  
56  
57  
58  
59  
60

33. Shen JJ, Wan T, Perlin JB. An exploration of the complex relationship of socioecologic factors in the treatment and outcomes of acute myocardial infarction in disadvantaged populations. *Health services research* 2001;36(4):711.

For peer review only



Table 1. Characteristics of the study sample from the Korea HEXA-Gem dataset (N = 2,932), 2005-2013, stratified by self-reported ongoing management of post-ischemic heart disease

|                             |                   | Ongoing management        |       |                        |      |      |
|-----------------------------|-------------------|---------------------------|-------|------------------------|------|------|
|                             |                   | Yes<br>(N = 2,474, 84.4%) |       | No<br>(N = 458, 15.6%) |      |      |
|                             |                   | N                         | (%)   | N                      | (%)  |      |
| Sex                         | Men               | 1,307                     | 89.0  | 161                    | 11.0 | *    |
|                             | Women             | 1,167                     | 79.7  | 297                    | 20.3 |      |
| Age (years)                 | 40–49             | 251                       | 71.3  | 101                    | 28.7 | *    |
|                             | 50–59             | 959                       | 83.5  | 190                    | 16.5 |      |
|                             | 60–69             | 1,264                     | 88.3  | 167                    | 11.7 |      |
| Education                   | ≤Middle school    | 1,095                     | 86.4  | 172                    | 13.6 | *    |
|                             | High school       | 868                       | 82.0  | 191                    | 18.0 |      |
|                             | ≥College          | 487                       | 84.3  | 91                     | 15.7 |      |
|                             | Missing           | 24                        | 85.7  | 4                      | 14.3 |      |
| Income (million Korean won) | <1                | 419                       | 84.3  | 78                     | 15.7 | *    |
|                             | 1–2               | 595                       | 87.4  | 86                     | 12.6 |      |
|                             | 2–4               | 802                       | 84.9  | 143                    | 15.1 |      |
|                             | ≥4                | 416                       | 80.9  | 98                     | 19.1 |      |
|                             | Missing           | 242                       | 82.0  | 53                     | 18.0 |      |
| Occupation                  | White collar      | 643                       | 82.0  | 141                    | 18.0 | *    |
|                             | Blue collar       | 377                       | 85.9  | 62                     | 14.1 |      |
|                             | Housewife         | 745                       | 81.2  | 173                    | 18.8 |      |
|                             | Other             | 479                       | 91.1  | 47                     | 8.9  |      |
|                             | Missing           | 230                       | 86.8  | 35                     | 13.2 |      |
|                             | Marital status    | Living with spouse        | 2,173 | 84.8                   | 388  | 15.2 |
| Living without spouse       |                   | 293                       | 80.7  | 70                     | 19.3 |      |
| Missing                     |                   | 8                         | 100.0 | 0                      | 0.0  |      |
| Comorbidities               | Hypertension      | 1,296                     | 80.5  | 315                    | 19.5 | *    |
|                             | No hypertension   | 1,178                     | 89.2  | 143                    | 10.8 |      |
|                             | Diabetes          | 1,982                     | 83.3  | 398                    | 16.7 | *    |
|                             | No diabetes       | 492                       | 89.1  | 60                     | 10.9 |      |
|                             | Hyperlipidemia    | 1,945                     | 84.4  | 360                    | 15.6 |      |
|                             | No hyperlipidemia | 529                       | 84.4  | 98                     | 15.6 |      |

\* Differences between two groups for the all variables were considered significant at a p value <0.05

Table 2. Estimations from the two-level multilevel logistic regression models of self-reported ongoing management among ischemic heart disease survivors in the Korea HEXA-Gem dataset, 2005-2013

|                                          | Model 1    |                         | Model 2    |                         | Model 3    |                         |
|------------------------------------------|------------|-------------------------|------------|-------------------------|------------|-------------------------|
|                                          | Odds Ratio | (95% Credible Interval) | Odds Ratio | (95% Credible Interval) | Odds Ratio | (95% Credible Interval) |
| <i>Fixed Parameters</i>                  |            |                         |            |                         |            |                         |
| Sex (ref. Female)                        |            |                         |            |                         |            |                         |
| Male                                     |            |                         | 2.99       | (2.10–4.31)             | 2.90       | (2.07–4.06)             |
| Age (years; ref. 40–49)                  |            |                         |            |                         |            |                         |
| 50–59                                    |            |                         | 1.77       | (1.25–2.38)             | 1.73       | (1.25–2.39)             |
| 61–69                                    |            |                         | 2.33       | (1.59–3.20)             | 2.25       | (1.58–3.22)             |
| Education (ref. ≤Middle school)          |            |                         |            |                         |            |                         |
| High school                              |            |                         | 1.46       | (1.11–1.87)             | 1.46       | (1.12–1.88)             |
| ≥College                                 |            |                         | 2.04       | (1.38–2.93)             | 2.05       | (1.42–2.90)             |
| Income (ref. <1 million Korean won)      |            |                         |            |                         |            |                         |
| 1–2 million                              |            |                         | 1.30       | (0.95–1.72)             | 1.27       | (0.92–1.74)             |
| 2–4 million                              |            |                         | 1.04       | (0.72–1.53)             | 1.02       | (0.69–1.51)             |
| ≥4 million                               |            |                         | 1.02       | (0.68–1.47)             | 1.00       | (0.68–1.48)             |
| Marital status (ref. Living with spouse) |            |                         |            |                         |            |                         |
| Living without spouse                    |            |                         | 0.90       | (0.61–1.26)             | 0.88       | (0.61–1.27)             |
| Occupation (ref. White collar)           |            |                         |            |                         |            |                         |
| Blue collar                              |            |                         | 1.07       | (0.72–1.56)             | 1.02       | (0.70–1.50)             |
| Housewife                                |            |                         | 1.42       | (1.00–1.95)             | 1.38       | (0.98–1.93)             |
| Other                                    |            |                         | 1.24       | (0.81–1.83)             | 1.18       | (0.78–1.80)             |
| Hypertension (ref. No)                   |            |                         |            |                         |            |                         |
| Yes                                      |            |                         | 1.67       | (1.28–2.13)             | 1.64       | (1.27–2.12)             |
| Diabetes (ref. No)                       |            |                         |            |                         |            |                         |
| Yes                                      |            |                         | 1.13       | (0.80–1.53)             | 1.12       | (0.81–1.57)             |
| Hyperlipidemia (ref. No)                 |            |                         |            |                         |            |                         |
| Yes                                      |            |                         | 0.88       | (0.65–1.15)             | 0.88       | (0.66–1.17)             |

1  
2  
3  
4  
5  
6  
7  
8  
9  
10  
11  
12  
13  
14  
15  
16  
17  
18  
19  
20  
21  
22  
23  
24  
25  
26  
27  
28  
29  
30  
31  
32  
33  
34  
35  
36  
37  
38  
39  
40  
41  
42  
43  
44  
45  
46  
47

|                                                     |         |             |         |             |         |             |
|-----------------------------------------------------|---------|-------------|---------|-------------|---------|-------------|
| Neighborhood-level income status                    | 1.24    | (1.01–1.52) |         |             | 1.24    | (1.03–1.46) |
| Neighborhood-level % of college graduates or higher | 1.71    | (1.16–2.56) |         |             | 1.13    | (0.93–1.45) |
| <i>Random Parameters</i>                            |         |             |         |             |         |             |
| Between-neighborhood variance                       | 0.12    | (0.02–0.34) | 0.13    | (0.02–0.39) | 0.14    | (0.02–0.41) |
| DIC                                                 | 2029.82 |             | 1926.20 |             | 1924.07 |             |

Note: Model 1 included the neighborhood-level SES only; model 2 included individual-level factors only; model 3 included all individual. All models were controlled for year dummies.

For peer review only

1  
2  
3  
4  
5  
6  
7  
8  
9  
10  
11  
12  
13  
14  
15  
16  
17  
18  
19  
20  
21  
22  
23  
24  
25  
26  
27  
28  
29  
30  
31  
32  
33  
34  
35  
36  
37  
38  
39  
40  
41  
42  
43  
44  
45  
46  
47  
48  
49  
50  
51  
52  
53  
54  
55  
56  
57  
58  
59  
60

Figure 1. Study areas of 17 major cities and counties in the Korea HEXA-Gem dataset, 2005-2013

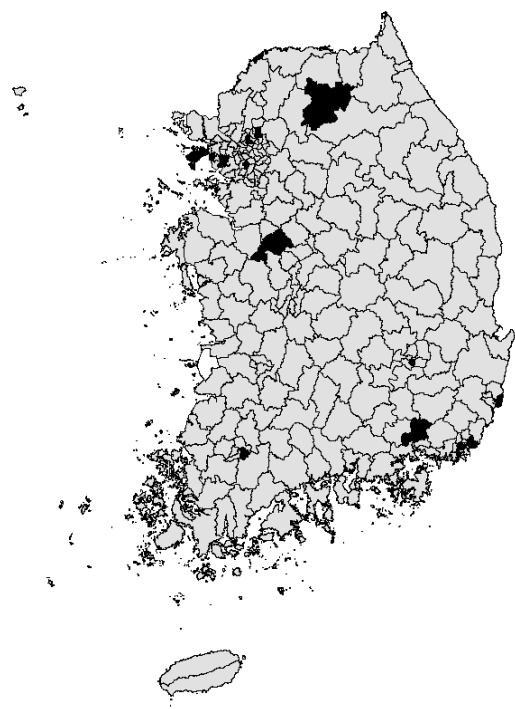

review only

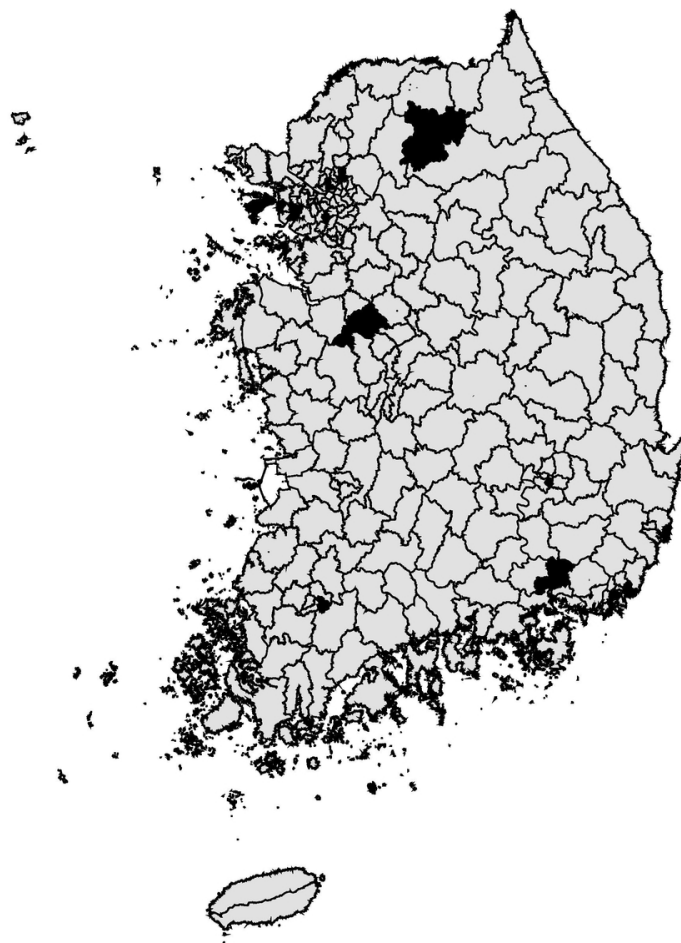

Figure 1. Study areas of 17 major cities and counties in the Korea HEXA-Gem dataset, 2005-2013

101x96mm (300 x 300 DPI)

1  
2  
3  
4  
5  
6  
7  
8  
9  
10  
11  
12  
13  
14  
15  
16  
17  
18  
19  
20  
21  
22  
23  
24  
25  
26  
27  
28  
29  
30  
31  
32  
33  
34  
35  
36  
37  
38  
39  
40  
41  
42  
43  
44  
45  
46  
47  
48  
49  
50  
51  
52  
53  
54  
55  
56  
57  
58  
59  
60STROBE Statement—Checklist of items that should be included in reports of *cross-sectional studies*

|                              | Item No | Recommendation                                                                                                                                                                                               | Page No. |
|------------------------------|---------|--------------------------------------------------------------------------------------------------------------------------------------------------------------------------------------------------------------|----------|
| <b>Title and abstract</b>    | 1       | (a) Indicate the study's design with a commonly used term in the title or the abstract                                                                                                                       | 2        |
|                              |         | (b) Provide in the abstract an informative and balanced summary of what was done and what was found                                                                                                          | 2        |
| <b>Introduction</b>          |         |                                                                                                                                                                                                              |          |
| Background/rationale         | 2       | Explain the scientific background and rationale for the investigation being reported                                                                                                                         | 4        |
| Objectives                   | 3       | State specific objectives, including any prespecified hypotheses                                                                                                                                             | 5        |
| <b>Methods</b>               |         |                                                                                                                                                                                                              |          |
| Study design                 | 4       | Present key elements of study design early in the paper                                                                                                                                                      | 5, 7     |
| Setting                      | 5       | Describe the setting, locations, and relevant dates, including periods of recruitment, exposure, follow-up, and data collection                                                                              | 5        |
| Participants                 | 6       | (a) Give the eligibility criteria, and the sources and methods of selection of participants                                                                                                                  | 5        |
| Variables                    | 7       | Clearly define all outcomes, exposures, predictors, potential confounders, and effect modifiers. Give diagnostic criteria, if applicable                                                                     | 6, 7     |
| Data sources/<br>measurement | 8*      | For each variable of interest, give sources of data and details of methods of assessment (measurement). Describe comparability of assessment methods if there is more than one group                         | 6, 7     |
| Bias                         | 9       | Describe any efforts to address potential sources of bias                                                                                                                                                    | 6, 7     |
| Study size                   | 10      | Explain how the study size was arrived at                                                                                                                                                                    | 6, 7     |
| Quantitative<br>variables    | 11      | Explain how quantitative variables were handled in the analyses. If applicable, describe which groupings were chosen and why                                                                                 | 7        |
| Statistical methods          | 12      | (a) Describe all statistical methods, including those used to control for confounding                                                                                                                        | 7        |
|                              |         | (b) Describe any methods used to examine subgroups and interactions                                                                                                                                          | -        |
|                              |         | (c) Explain how missing data were addressed                                                                                                                                                                  | 7        |
|                              |         | (d) If applicable, describe analytical methods taking account of sampling strategy                                                                                                                           | 7        |
|                              |         | (e) Describe any sensitivity analyses                                                                                                                                                                        | -        |
| <b>Results</b>               |         |                                                                                                                                                                                                              |          |
| Participants                 | 13*     | (a) Report numbers of individuals at each stage of study—eg numbers potentially eligible, examined for eligibility, confirmed eligible, included in the study, completing follow-up, and analysed            | 8        |
|                              |         | (b) Give reasons for non-participation at each stage                                                                                                                                                         | -        |
|                              |         | (c) Consider use of a flow diagram                                                                                                                                                                           | -        |
| Descriptive data             | 14*     | (a) Give characteristics of study participants (eg demographic, clinical, social) and information on exposures and potential confounders                                                                     | 17       |
|                              |         | (b) Indicate number of participants with missing data for each variable of interest                                                                                                                          | 7        |
| Outcome data                 | 15*     | Report numbers of outcome events or summary measures                                                                                                                                                         | 8, 17    |
| Main results                 | 16      | (a) Give unadjusted estimates and, if applicable, confounder-adjusted estimates and their precision (eg, 95% confidence interval). Make clear which confounders were adjusted for and why they were included | 8-9, 18  |

|                          |    |                                                                                                                                                                            |    |
|--------------------------|----|----------------------------------------------------------------------------------------------------------------------------------------------------------------------------|----|
|                          |    | (b) Report category boundaries when continuous variables were categorized                                                                                                  | 17 |
|                          |    | (c) If relevant, consider translating estimates of relative risk into absolute risk for a meaningful time period                                                           | -  |
| Other analyses           | 17 | Report other analyses done—eg analyses of subgroups and interactions, and sensitivity analyses                                                                             | -  |
| <b>Discussion</b>        |    |                                                                                                                                                                            |    |
| Key results              | 18 | Summarise key results with reference to study objectives                                                                                                                   | 9  |
| Limitations              | 19 | Discuss limitations of the study, taking into account sources of potential bias or imprecision. Discuss both direction and magnitude of any potential bias                 | 11 |
| Interpretation           | 20 | Give a cautious overall interpretation of results considering objectives, limitations, multiplicity of analyses, results from similar studies, and other relevant evidence | 11 |
| Generalisability         | 21 | Discuss the generalisability (external validity) of the study results                                                                                                      | 11 |
| <b>Other information</b> |    |                                                                                                                                                                            |    |
| Funding                  | 22 | Give the source of funding and the role of the funders for the present study and, if applicable, for the original study on which the present article is based              | 13 |

\*Give information separately for exposed and unexposed groups.

**Note:** An Explanation and Elaboration article discusses each checklist item and gives methodological background and published examples of transparent reporting. The STROBE checklist is best used in conjunction with this article (freely available on the Web sites of PLoS Medicine at <http://www.plosmedicine.org/>, Annals of Internal Medicine at <http://www.annals.org/>, and Epidemiology at <http://www.epidem.com/>). Information on the STROBE Initiative is available at [www.strobe-statement.org](http://www.strobe-statement.org).

# BMJ Open

## Neighborhood- and Individual-level Socioeconomic Status and Self-reported Management of Ischemic Heart Disease: Cross-sectional Results from the Korea Health Examinees Study

|                                 |                                                                                                                                                                                                                                                                                                                                                                                                                                                                                                                                                                                                                                                                                                                                                    |
|---------------------------------|----------------------------------------------------------------------------------------------------------------------------------------------------------------------------------------------------------------------------------------------------------------------------------------------------------------------------------------------------------------------------------------------------------------------------------------------------------------------------------------------------------------------------------------------------------------------------------------------------------------------------------------------------------------------------------------------------------------------------------------------------|
| Journal:                        | <i>BMJ Open</i>                                                                                                                                                                                                                                                                                                                                                                                                                                                                                                                                                                                                                                                                                                                                    |
| Manuscript ID                   | bmjopen-2018-021577.R2                                                                                                                                                                                                                                                                                                                                                                                                                                                                                                                                                                                                                                                                                                                             |
| Article Type:                   | Research                                                                                                                                                                                                                                                                                                                                                                                                                                                                                                                                                                                                                                                                                                                                           |
| Date Submitted by the Author:   | 13-Jul-2018                                                                                                                                                                                                                                                                                                                                                                                                                                                                                                                                                                                                                                                                                                                                        |
| Complete List of Authors:       | Heo, Jongho; National Assembly Futures Institute<br>Oh, Juhwan; Seoul National University College of Medicine, JW Lee Center for Global Medicine<br>Lee, Hwa-Young; Seoul National University College of Medicine, JW LEE Center for Global Medicine<br>Choi, Ji-Yeob; Seoul National University College of Medicine,<br>Kim, Sujin; Korea Institute for Health and Social Affairs<br>Subramanian, S V; Harvard School of Public Health, Department of Society, Human Development and<br>Lee, Jong-Koo; Seoul National University College of Medicine, Department of Family Medicine; Seoul National University Hospital, Policy and Development<br>Kang, Daehee; College of Medicine Seoul National University, Department of Preventive Medicine |
| <b>Primary Subject Heading</b>: | Cardiovascular medicine                                                                                                                                                                                                                                                                                                                                                                                                                                                                                                                                                                                                                                                                                                                            |
| Secondary Subject Heading:      | Epidemiology, Public health                                                                                                                                                                                                                                                                                                                                                                                                                                                                                                                                                                                                                                                                                                                        |
| Keywords:                       | angina, myocardial infraction, multilevel analysis, MCMC, SES, Korea                                                                                                                                                                                                                                                                                                                                                                                                                                                                                                                                                                                                                                                                               |
|                                 |                                                                                                                                                                                                                                                                                                                                                                                                                                                                                                                                                                                                                                                                                                                                                    |

SCHOLARONE™  
Manuscripts



# Neighborhood- and Individual-level Socioeconomic Status and Self-reported Management of Ischemic Heart Disease: Cross-sectional Results from the Korea Health Examinees Study

Jongho Heo<sup>1</sup>, Juhwan Oh<sup>2</sup>, Hwa-Young Lee<sup>2</sup>, Ji-Yeob Choi<sup>3,4,5</sup>, Sujin Kim<sup>6,7</sup>, SV Subramanian<sup>8</sup>, Jong-Koo Lee<sup>\*2,9</sup>, and Daehee Kang<sup>\*3,4,5,10</sup>

<sup>1</sup>National Assembly Futures Institute, Seoul, Korea; <sup>2</sup>JW Lee Center for Global Medicine, Seoul National University College of Medicine, Seoul, Korea; <sup>3</sup>Department of Biomedical Sciences, Seoul National University Graduate School, Seoul, Korea; <sup>4</sup>Department of Preventive Medicine, Seoul National University College of Medicine, Seoul, Korea; <sup>5</sup>Cancer Research Institute, Seoul National University, Seoul, Korea; <sup>6</sup>Institute for Health and Environment, Seoul National University, Seoul, Korea; <sup>7</sup>Korea Institute for Health and Social Affairs, Sejong-si, South Korea; <sup>8</sup>Department of Social and Behavioral Science, Harvard School of Public Health, Boston, MA, USA; <sup>9</sup>Department of Family Medicine, Seoul National University College of Medicine, Seoul, Korea; <sup>10</sup>Institute of Environmental Medicine, Seoul National University Medical Research Center, Seoul, Korea

**\*JL and DK contributed equally to this paper as corresponding authors.**

**Corresponding author: Jong-Koo Lee**

JW Lee Center for Global Medicine  
Seoul National University College of Medicine  
Tel: +82-2-740-8922/ Fax: +82-2-766-1185  
E-mail: docmohw@snu.ac.kr

Main text word count: 2,546

Abstract word count: 248

# Neighborhood- and Individual-level Socioeconomic Status and Self-reported Management of Ischemic Heart Disease: Cross-sectional Results from the Korea Health Examinees Study

## Abstract

**Objective:** Several studies identified neighborhood context as a predictor of prognosis in ischemic heart disease (IHD). The present study investigates the relationships of neighborhood- and individual-level socioeconomic status (SES) with the odds of ongoing management of IHD, using baseline survey data from the Korea Health Examinees-Gem study.

**Design:** In this cross-sectional study, we estimated the association of the odds of self-reported ongoing management with the neighborhood-level income status and percentage of college graduates after controlling for individual-level covariates using two-level multilevel logistic regression models based on the Markov Chain Monte Carlo function.

**Setting:** A survey conducted at 17 large general hospitals in major Korean cities and metropolitan areas during 2005–2013.

**Participants:** 2,932 adult men and women.

**Outcome measure:** The self-reported status of management after incident angina or myocardial infarction.

**Results:** At the neighborhood level, residence in a higher-income neighborhood was associated with the self-reported ongoing management of IHD, after controlling for individual-level covariates [odds ratio (OR): 1.22, 95% credible interval (CI): 1.01–1.61]. At the individual level, higher education was associated with the ongoing IHD management (high school graduation, OR: 1.33, 95% CI: 1.08–1.65); college or higher, OR: 1.63, 95% CI: 1.22–2.12; reference, middle school graduation or below).

**Conclusions:** Our study suggests that policies or interventions aimed at improving the quality and availability of medical resources in low-income areas may associate with ongoing IHD management. Moreover, patient-centered education is essential for ongoing IHD management, especially when targeted to IHD patients with a low education level.

**Keywords:** angina, myocardial infarction, multilevel analysis, MCMC, SES, Korea

### Strengths and Limitations of this Study

- This study is among the first to examine the association between neighborhood- and individual-level SES and ongoing management of ischemic heart disease in Asian countries.
- Our study benefitted from the use of population-based samples, which enabled a multi-level analysis based on the neighborhood-level socioeconomic status.
- However, our findings were limited by the cross-sectional study design, use of survey data, and risk of selection bias.

## INTRODUCTION

Ischemic heart disease (IHD), the current leading cause of death in Western countries, is rapidly becoming the leading cause of death in developing countries.<sup>1</sup> To reduce the mortality associated with IHD, researchers and clinicians have stressed the importance of patient management. Based on evidence demonstrating that medication adherence and behavioral lifestyle changes improved prognosis and retarded disease progression, guidelines for secondary IHD prevention suggest that patient management should comprise pharmacologic treatments (e.g., antiplatelet therapy, beta-blocker therapy) or lifestyle modifications (e.g., weight control, smoking cessation, blood pressure management).<sup>2,3</sup>

Earlier research suggests that the management of post-IHD may differ by socioeconomic status (SES). Notably, the lower rates of mortality among IHD patients with a high SES<sup>4</sup> may be attributable to the availability of better care,<sup>5</sup> better adherence to therapy, better self-monitoring,<sup>6</sup> and more rapid implementation of behavioral lifestyle changes,<sup>7</sup> which are facilitated by economic, educational, and social resources. Independent of the individual-level SES, neighborhood contexts also play critical roles in various health outcomes, including IHD-related outcomes.<sup>8,9</sup> Several previous studies have shown that residence in a socioeconomically disadvantaged neighborhoods was associated with a greater risk of IHD<sup>10</sup> and shorter survival duration.<sup>12,13</sup> However, few studies have examined the association between the neighborhood SES and IHD management.

To our knowledge, no study has addressed this association in South Korea (hereafter Korea) or another Asian country. Although the IHD-related mortality rate in 2011 remained lower in Korea (42 per 100,000 individuals) than in Western countries, the incidence of IHD in Korea has increased by 60% during the past decade<sup>14</sup> consequent to increases in body mass index values and an increasingly westernized diet among middle-aged adults.<sup>15</sup> Secondary IHD

1  
2  
3  
4 mortality may be significantly reduced by ongoing IHD management involving both proper  
5  
6 quality treatment and lifestyle modification, which may be shaped by neighborhood contexts  
7  
8 as well as individual characteristics. Therefore, this study aimed to evaluate the individual-  
9  
10 and neighborhood-level SES as the main determinants of ongoing IHD management in Korea,  
11  
12 using baseline data from a large population-based cohort study with a multi-level framework.  
13  
14  
15  
16  
17

## 18 **METHODS**

### 19 **Data source**

20  
21  
22 We used baseline survey data from the Health Examinees-Gem (HEXA\_G) study, which was  
23  
24 constructed by dropping inconsistent data collected during pilot HEXA survey periods. The  
25  
26 original HEXA, which is part of the Korean Genome Epidemiology Study (KoGES),<sup>16</sup> was a  
27  
28 large-scale genomic cohort study of 169,722 adults aged 40–69 years living in major Korean  
29  
30 cities and metropolitan areas. Samples were recruited from 38 health examination centers and  
31  
32 training hospitals (mainly general hospitals) during 2004–2013.<sup>17</sup> Eligible participants who  
33  
34 visited the participating sites for biannual health check-ups, which were covered in full by the  
35  
36 National Health Insurance Program were asked to respond voluntarily to an interview-based  
37  
38 survey conducted by well-trained interviewers using a structured questionnaire. The survey  
39  
40 collected information about socio-demographic characteristics, medical history, medication  
41  
42 usage, family history, and health/lifestyle behaviors. More detailed information about the  
43  
44 HEXA cohort study can be found elsewhere.<sup>16 17</sup> The HEXA-G dataset comprised 139,345  
45  
46 participants [men: 46,977 (33.7%); women: 92,368 (66.3%)]. Participants were excluded  
47  
48 because of inconsistencies in data quality control, bio-specimen collection, a short duration of  
49  
50  
51  
52  
53  
54  
55  
56  
57  
58  
59  
60

1  
2  
3  
4 study participation at 21 centers that participated in a pilot study, or the withdrawal of  
5  
6 provision of personal information for studies.  
7  
8  
9

### 10 11 **Patient and public involvement** 12

13  
14 All participants completed a consent form before responding to the survey. The original  
15  
16 HEXA and HEXA-G were deidentified for research. The study was approved by the  
17  
18 Institutional Review Board (IRB) of Seoul National University Hospital, Seoul, Korea (IRB  
19  
20 No. 0608-018-179).  
21  
22  
23  
24  
25

### 26 27 **Study outcome** 28

29  
30 The outcome of the study was the self-reported current management status after incident  
31  
32 angina or myocardial infarction. To identify participants with a history of IHD, the survey  
33  
34 included the yes/no question of “Have you ever been diagnosed with angina or myocardial  
35  
36 infarction by a medical doctor in a medical facility?” The sub-population that responded “yes”  
37  
38 then answered a sub-question regarding the current status of disease management for which  
39  
40 the following options were available: (a) “condition has been good or improved due to  
41  
42 management”; (b) “currently managed and treated”; (c) “was previously managed but is now  
43  
44 neglected”; and (d) “neither managed nor treated.” We dichotomized these responses as  
45  
46 “ongoing management” by combining (a) with (b) versus “failure of ongoing management”  
47  
48 (reference) by combining (c) with (d), respectively.  
49  
50  
51  
52  
53

### 54 55 **Neighborhood-level SES variables** 56 57 58 59 60

1  
2  
3  
4 The main neighborhood-level SES variables were (1) the regional median income status and  
5  
6 (2) the regional mean percentage of college graduates. Seventeen neighborhoods were  
7  
8 defined as 17 major cities and metropolitan areas (mean population: 201,210, range: 115,000-  
9  
10 574,000) associated with 17 large general hospitals (Figure 1). The total catchment area of  
11  
12 these hospitals covered 6.6% of the total Korean population. We obtained neighborhood-level  
13  
14 SES data from a nationally and regionally representative dataset, Korea Community Health  
15  
16 Survey (<https://chs.cdc.go.kr/chs/index.do>), which has been conducted in 253 communities  
17  
18 annually since 2008. This survey aims to estimate regional patterns of disease prevalence and  
19  
20 morbidity, as well as to understand the personal lifestyle and health behavior.<sup>18</sup> An average of  
21  
22 800-900 adults (age:  $\geq 19$  years) who resided in each neighborhood were selected using the  
23  
24 probability proportional to sampling and systematic sampling methods. The sampling  
25  
26 strategies are described in more detail elsewhere.<sup>18</sup> We calculated exogenous neighborhood-  
27  
28 level SES measures using regional mean centering of the percentage of college graduates and  
29  
30 median centering of the income status of the survey years. We then linked the regional SES  
31  
32 indicators to our main dataset using the neighborhood identifier and the year variable. A  
33  
34 comparison of socio-demographic characteristics between neighborhoods included and not  
35  
36 included in the study revealed that the former was comprised of younger (age: 49.2 vs. 52.9  
37  
38 years), more highly educated (college graduates: 43.9% vs. 33.0%), and wealthier (the top 25%  
39  
40 of household incomes: 30.9% vs. 27.8%) population.  
41  
42  
43  
44  
45  
46  
47

### 48 **Individual-level SES variables**

49

50  
51 Educational level was categorized into middle school or lower, high school graduation, or  
52  
53 college graduation or higher. Income was measured by collapsing the data into four  
54  
55 categories: <1, 1–2, 2–4, and  $\geq 4$  million Korean won (M KRW).  
56

## Covariates

The individual-level covariates included sex, age, marital status occupation, and comorbidities. Age was categorized into 40–50, 51–60, or 61+ years. Marital status was dichotomized into living with a spouse or not. Occupation was categorized as white collar, blue collar, housewife, or other. Comorbidities were defined as the presence of hypertension, diabetes, or hyperlipidemia at the time of the survey.

## Statistical analysis

Two-level multilevel logistic regression models were fitted with individuals (level 1) nested within neighborhoods (level 2) to estimate the contributions of the individual- and neighborhood-level factors simultaneously. Random intercept models were fitted for the whole study samples to correct for cluster effects of the individual variables within the same neighborhood according to the neighborhood identifier in the model. We used the command *runmlwin* to run *MLwiN* within Stata software (Stata Corp. College Station, TX, USA).<sup>19</sup> This command enables researchers to fit multilevel models more quickly with *MLwiN* by taking advantage of the multi-level dataset analysis features included in Stata.<sup>19</sup> *MLwiN* was used to fit a binomial logit response model to an estimation using the Iterative Generalized Least Squares (IGLS) and second-order penalized quasi-likelihood (PQL2).

Estimates obtained using the above-described methods are known to exhibit a bias for discrete responses;<sup>20</sup> therefore, we fitted our final model using the Markov chain Monte Carlo (MCMC) function. Additionally, we adopted the Bayesian estimation function to ensure the accuracy of the estimates and their standard errors, as a small sample size at level two can



1  
2  
3  
4 lead to biased estimates.<sup>21 22</sup> The MCMC was conducted to burn-in for 500 simulations,  
5  
6 which yielded distribution starting values to discard, and subsequently to proceed for 5,000  
7  
8 additional simulations to obtain a precise estimate and distribution of interest. Once the  
9  
10 convergence diagnostics were confirmed, the odds ratios (ORs) and 95% credible intervals  
11  
12 (CIs) were presented in a Bayesian framework. We created separate missing dummy  
13  
14 categories to retain the missing cases in income (n=295), occupation (n=265), and other  
15  
16 covariate data (n=35) in the regression analysis. Due to of little interpretive value, the results  
17  
18 for the category were not reported. We did not stratify the analyses by gender because a  
19  
20 Chow test [47] failed to detect significant differences in the slopes and intercepts of the  
21  
22 gender-stratified regressions [F (1, 2,364) =0.95, P=0.3309].  
23  
24  
25  
26  
27  
28

## 29 RESULTS

30  
31  
32 Table 1 presents the characteristics of participants with IHD from the HEXA-Gem dataset (n  
33  
34 = 2,932), stratified by self-reported IHD management. Men had higher proportions of self-  
35  
36 reported ongoing management than women (85.9% vs. 75.5%). Participants of younger  
37  
38 groups had higher proportions of failures of ongoing IHD management (40–49: 29.5% vs.  
39  
40 50–59: 21.3% vs. 60–69: 15.2%).  
41  
42

43  
44 Table 2 presents the results of the two-level multilevel logistic regression models for ongoing  
45  
46 IHD management. In Model 1, the odds of ongoing management were higher for those with  
47  
48 IHD who resided in higher-income neighborhoods, with an OR of 1.39 (95% CI: 1.15–1.66).  
49  
50 In Model 2, a higher individual education level was associated with ongoing IHD  
51  
52 management, with ORs of 1.35 (95% CI: 1.06–1.66) and 1.52 (95% CI: 1.14–2.02) for high  
53  
54 school graduation and college graduation or higher, respectively, compared to those with a  
55  
56

1  
2  
3  
4 middle school or lower education. However, no significant associations were observed  
5  
6 between an individual's income group and the likelihood of self-reported ongoing  
7  
8 management. In Model 3, the neighborhood-level income status remained significantly  
9  
10 associated with self-reported ongoing management even after adjusting for individual-level  
11  
12 factors (OR: 1.22, 95% CI 1.01–1.61). In this model, however, the association of residence in  
13  
14 a neighborhood with a high percentage of college graduates with self-reported ongoing IHD  
15  
16 management was not statistically significant. Finally, all models exhibited significant  
17  
18 between-neighborhood variance.  
19  
20  
21  
22  
23

## 24 **DISCUSSION**

25  
26  
27 According to our findings, residence in a neighborhood with a one-unit higher income was  
28  
29 associated with a 22% higher likelihood of self-reported ongoing IHD management,  
30  
31 compared to residence in a neighborhood with a lower income status. By contrast, at the  
32  
33 individual level, a higher income was not significantly associated with self-reported ongoing  
34  
35 IHD management. However, a higher individual education level was associated with a higher  
36  
37 likelihood of self-reported ongoing IHD management.  
38  
39  
40

41 Previous studies have found that a lower neighborhood SES was associated with a higher risk  
42  
43 of IHD<sup>10 11</sup> and a shorter survival duration after incident IHD.<sup>12 13</sup> Consistent with those  
44  
45 reports, our study showed an association of the neighborhood SES with ongoing IHD  
46  
47 management that was independent of individual-level factors. We attribute this association to  
48  
49 several factors. First, residents of higher-income neighborhoods may have greater access to  
50  
51 higher quality medical resources, such as physicians or primary care clinics near their homes,  
52  
53 regardless of individual income.<sup>23</sup> Second, residents in higher-income neighborhoods may  
54  
55  
56  
57  
58  
59  
60

1  
2  
3  
4 enjoy a more favorable social environment for IHD management, which might include an  
5  
6 increased interest in health maintenance and a greater amount of social support from  
7  
8 neighbors.<sup>24</sup> Third, residents of lower-income neighborhoods might have reduced access to  
9  
10 health-oriented features such as recreation spaces and walkable environments<sup>25</sup> and stores  
11  
12 that sell healthy foods,<sup>26</sup> concomitant with increased access to stores selling cigarettes and/or  
13  
14 alcohol<sup>27</sup> and exposure to other environmental stressors. These factors may have important  
15  
16 implications for self-care practices.  
17

18  
19 At the individual SES level, our study found that the education level was significantly  
20  
21 associated with ongoing IHD management, whereas the income status was not. Similarly,  
22  
23 previous studies also reported that IHD management may vary according to an individual's  
24  
25 SES, and suggested that the survivors with lower income and education levels might fail to  
26  
27 manage themselves appropriately because of (a) a lack of knowledge related to prevention  
28  
29 and healthy habits,<sup>28</sup> (b) limited access to care or drugs due to economic constraints,<sup>29</sup> and (c)  
30  
31 a lack of willingness or resources to change their lifestyles.<sup>7</sup> Patient education has been  
32  
33 identified as an important factor in terms of the understanding of a specific disease process,  
34  
35 medication management and adherence, and reported efficacies and side effects.<sup>3</sup> Previous  
36  
37 studies demonstrated improved adherence to suggested management among IHD patients  
38  
39 with higher education levels,<sup>30</sup> whereas patients with lower education levels may not adhere  
40  
41 to guidelines because of a lack of knowledge or understanding about their disease.  
42  
43

44  
45 Alternatively, our study findings may reflect sub-optimal doctor-patient communication due  
46  
47 to the exceptionally short consultation times with physicians in Korea, which are generally  
48  
49 restricted to 2–3 minutes because of the lack of physicians and fee-for-service payment in the  
50  
51 Korean healthcare system.<sup>31</sup> This restriction may stunt ongoing IHD management, especially  
52  
53 among patients with lower education levels. Accordingly, our findings suggest that  
54  
55

1  
2  
3  
4 individualized education could maximize IHD management outcomes.  
5

6  
7 Our finding that the individual-level income status and ongoing IHD management were not  
8  
9 associated may imply that economic barriers to care or drugs do not determine the ongoing  
10  
11 management of this condition. However, previous studies have shown that economically  
12  
13 disadvantaged patients might be more likely to decline follow-up procedures or prescribed  
14  
15 medications because economic constraint.<sup>5 29</sup> Our favorable study finding of no significant  
16  
17 income inequality might therefore be explained by the universal healthcare coverage benefits  
18  
19 and medical subsidies provided to lower-income populations in Korea.<sup>31</sup>  
20

21  
22 Our study had several limitations of note. First, our cross-sectional study was unable to  
23  
24 determine the causal relationship between our main exposures (e.g., individual- and  
25  
26 neighborhood-level SES) and the self-reported management of IHD. Second, our study used  
27  
28 self-reported survey data, which may have been biased by misclassification due to  
29  
30 participants' misunderstanding or social desirability. Additionally, the participants' responses  
31  
32 regarding ongoing IHD management may not have been confirmed by medical professionals  
33  
34 whether the received treatment or participants' adherence to therapy was clinically  
35  
36 appropriate. Third, we were not able to control for severity of IHD and time lapsed the acute  
37  
38 event because of data limitations. Fourth, selection bias may have been introduced by non-  
39  
40 random survey participation and attrition. Disadvantaged individuals were less likely to  
41  
42 participate regular health examinations and were more likely to drop out in the survey,  
43  
44 possibly due to a failure of ongoing management. This bias would have led to  
45  
46 underestimating the likelihood of failure of ongoing management among disadvantaged  
47  
48 individuals. Fifth, we assumed that most participants visited the general hospitals within the  
49  
50 region they lived. This assumption is highly plausible, given the improved accessibility to the  
51  
52 health examination service in Korea contexts, as the National Health Insurance Program  
53  
54  
55  
56

1  
2  
3  
4 provides free regular health examinations and medical facilities within and between regions  
5  
6 exhibit minimal variations in examination quality.<sup>32</sup> However, we could not completely  
7  
8 exclude the possibility that participants may have visited general hospitals in other  
9  
10 neighborhoods to seek better-quality evaluations. Despite these limitations, however, one  
11  
12 strength of our study was the use of population-based samples, which enabled a multi-level  
13  
14 analysis by linking neighborhood-level SES from the nationally and regionally representative  
15  
16 dataset. By contrast, most previous studies used hospital data, which frequently lack  
17  
18 information about the individual's SES and neighborhood characteristics.<sup>33</sup> Moreover, to the  
19  
20 best of our knowledge, this is among the first studies to examine the association between  
21  
22 individual- and neighborhood-level SES and IHD management in an Asian country.  
23  
24

25  
26 In conclusion, our study findings provide an opportunity to improve ongoing IHD  
27  
28 management by identifying the neighborhood- and individual-level factors, which are  
29  
30 associated with SES-related and geographic inequalities in IHD mortality. Our results suggest  
31  
32 that policies or interventions intended to improve the quality and availability of medical  
33  
34 resources in low-income areas might also effectively reduce inequalities in management and,  
35  
36 ultimately, mortality. Moreover, our data suggest that patient-centered education is required  
37  
38 to ensure ongoing IHD management and reduce related mortality, particularly among patients  
39  
40 with a low education level.  
41  
42  
43  
44  
45  
46  
47  
48  
49  
50  
51  
52  
53  
54  
55  
56  
57  
58  
59  
60

## Acknowledgments

This work was supported by a Research Program funded by the Korea Centers for Disease Control and Prevention (2004-E71004-00, 2005-E71011-00, 2005-E71009-00, 2006-E71001-00, 2006-E71004-00, 2006-E71010-00, 2006-E71003-00, 2007-E71004-00, 2007-E71006-00, 2008-E71006-00, 2008-E71008-00, 2009-E71009-00, 2010-E71006-00, 2011-E71006-00, 2012-E71001-00, and 2013-E71009-00).

## Author Contributions

JH analyzed the data; drafted, reviewed, and edited the manuscript; and contributed to the discussion. JKL and DK conducted, designed, and supervised the study; reviewed and edited the manuscript; and contributed to the discussion. JO, HYL, JYC, SK, and SVS reviewed and edited the manuscript and contributed to the discussion.

## Conflicts of Interest

The authors declare no conflicts of interest.

## A data sharing statement

Data sharing of HEXA is available through the website of the Korea National Institute of Health ([http://www.nih.go.kr/NIH/cms/content/eng/03/65203\\_view.html#menu4\\_1\\_2](http://www.nih.go.kr/NIH/cms/content/eng/03/65203_view.html#menu4_1_2)).

## References

1. Yusuf S, Reddy S, Ôunpûu S, et al. Global burden of cardiovascular diseases. *Circulation* 2001;104(23):2855-64.
2. Fihn SD, Gardin JM, Abrams J, et al. 2012 ACCF/AHA/ACP/AATS/PCNA/SCAI/STS Guideline for the Diagnosis and Management of Patients With Stable Ischemic Heart Disease. *Journal of the American College of Cardiology* 2012;24(60):e44-e164.
3. Fihn SD, Blankenship JC, Alexander KP, et al. 2014 ACC/AHA/AATS/PCNA/SCAI/STS focused update of the guideline for the diagnosis and management of patients with stable ischemic heart disease. *Circulation* 2014;CIR. 0000000000000095.
4. Molshatzki N, Drory Y, Myers V, et al. Role of socioeconomic status measures in long-term mortality risk prediction after myocardial infarction. *Medical care* 2011;49(7):673-78.
5. Philbin EF, McCullough PA, DiSalvo TG, et al. Socioeconomic status is an important determinant of the use of invasive procedures after acute myocardial infarction in New York State. *Circulation* 2000;102(19 Suppl 3):III107-III15.
6. Goldman DP, Smith JP. Can patient self-management help explain the SES health gradient? *Proceedings of the National Academy of Sciences* 2002;99(16):10929-34.
7. Lantz PM, Lynch JW, House JS, et al. Socioeconomic disparities in health change in a longitudinal study of US adults: the role of health-risk behaviors. *Social science & medicine* 2001;53(1):29-40.
8. Steenland K, Henley J, Calle E, et al. Individual-and area-level socioeconomic status variables as predictors of mortality in a cohort of 179,383 persons. *American journal of epidemiology* 2004;159(11):1047-56.
9. Kawachi I, Berkman LF. Neighborhoods and health: Oxford University Press 2003.
10. Sundquist K, Winkleby M, Ahlén H, et al. Neighborhood socioeconomic environment and incidence of coronary heart disease: a follow-up study of 25,319 women and men in Sweden. *American journal of epidemiology* 2004;159(7):655-62.
11. Merlo J, Ohlsson H, Chaix B, et al. Revisiting causal neighborhood effects on individual ischemic heart disease risk: a quasi-experimental multilevel analysis among Swedish siblings. *Social science & medicine* 2013;76:39-46.
12. Foraker RE, Patel MD, Whitsel EA, et al. Neighborhood socioeconomic disparities and 1-year case fatality after incident myocardial infarction: The Atherosclerosis Risk in Communities (ARIC) Community Surveillance (1992-2002). *American heart journal* 2013;165(1):102-07.
13. Chaix B, Rosvall M, Merlo J. Neighborhood socioeconomic deprivation and residential instability: effects on incidence of ischemic heart disease and survival after myocardial infarction. *Epidemiology* 2007;18(1):104-11.
14. OECD. Health at a glance 2013: OECD indicators: OECD publishing 2013.
15. Suh I, Oh KW, Lee KH, et al. Moderate dietary fat consumption as a risk factor for ischemic

- heart disease in a population with a low fat intake: a case-control study in Korean men. *The American journal of clinical nutrition* 2001;73(4):722-27.
16. Kim Y, Han B-G. Cohort Profile: The Korean Genome and Epidemiology Study (KoGES) Consortium. *International journal of epidemiology* 2016:dyy316.
17. Shin S, Lee H-W, Kim CE, et al. Egg Consumption and Risk of Metabolic Syndrome in Korean Adults: Results from the Health Examinees Study. *Nutrients* 2017;9(7):687.
18. Kang YW, Ko YS, Kim YJ, et al. Korea community health survey data profiles. *Osong public health and research perspectives* 2015;6(3):211-17.
19. Leckie G, Charlton C. Runmlwin-a program to Run the MLwiN multilevel modelling software from within stata. *Journal of Statistical Software* 2013;52(11):1-40.
20. Snijders TA. Multilevel analysis. *International Encyclopedia of Statistical Science*: Springer 2011:879-82.
21. Maas CJ, Hox JJ. Sufficient sample sizes for multilevel modeling. *Methodology* 2005;1(3):86-92.
22. McNeish DM, Stapleton LM. The effect of small sample size on two-level model estimates: A review and illustration. *Educational Psychology Review* 2016;28(2):295-314.
23. Kapral MK, Wang H, Mamdani M, et al. Effect of socioeconomic status on treatment and mortality after stroke. *Stroke* 2002;33(1):268-75.
24. Uchino BN. Social support and health: a review of physiological processes potentially underlying links to disease outcomes. *Journal of behavioral medicine* 2006;29(4):377-87.
25. Sallis JF, Saelens BE, Frank LD, et al. Neighborhood built environment and income: examining multiple health outcomes. *Social science & medicine* 2009;68(7):1285-93.
26. Mobley LR, Root ED, Finkelstein EA, et al. Environment, obesity, and cardiovascular disease risk in low-income women. *American journal of preventive medicine* 2006;30(4):327-32. e1.
27. Cantrell J, Anesetti-Rothermel A, Pearson JL, et al. The impact of the tobacco retail outlet environment on adult cessation and differences by neighborhood poverty. *Addiction* 2015;110(1):152-61.
28. Bonaccio M, Bonanni AE, Di Castelnuovo A, et al. Low income is associated with poor adherence to a Mediterranean diet and a higher prevalence of obesity: cross-sectional results from the Moli-sani study. *BMJ open* 2012;2(6):e001685.
29. Forsberg PO, Li XJ, Sundquist K. Neighborhood socioeconomic characteristics and statin medication in patients with myocardial infarction: a Swedish nationwide follow-up study. *BMC Cardiovasc Disord* 2016;16:8. doi: 10.1186/s12872-016-0319-y
30. Kalichman SC, Catz S, Ramachandran B. Barriers to HIV/AIDS treatment and treatment adherence among African-American adults with disadvantaged education. *Journal of the National Medical Association* 1999;91(8):439.
31. Jones RS. Health-care reform in Korea. *OECD Economic Department Working Papers* 2010(797):0\_1.
32. Cho B, Lee CM. Current situation of national health screening systems in Korea. *J Korean Med Assoc* 2011;54(7):666-69.



1  
2  
3  
4  
5  
6  
7  
8  
9  
10  
11  
12  
13  
14  
15  
16  
17  
18  
19  
20  
21  
22  
23  
24  
25  
26  
27  
28  
29  
30  
31  
32  
33  
34  
35  
36  
37  
38  
39  
40  
41  
42  
43  
44  
45  
46  
47  
48  
49  
50  
51  
52  
53  
54  
55  
56  
57  
58  
59  
60

33. Shen JJ, Wan T, Perlin JB. An exploration of the complex relationship of socioecologic factors in the treatment and outcomes of acute myocardial infarction in disadvantaged populations. *Health services research* 2001;36(4):711.

For peer review only

Table 1. Characteristics of the study sample from the Korea HEXA-Gem dataset (N = 2,932), 2005-2013, stratified by self-reported ongoing management of post-ischemic heart disease

|                             |                   | Ongoing management        |       |                        |      |      |
|-----------------------------|-------------------|---------------------------|-------|------------------------|------|------|
|                             |                   | Yes<br>(N = 2,366, 80.7%) |       | No<br>(N = 566, 19.3%) |      |      |
|                             |                   | N                         | (%)   | N                      | (%)  |      |
| Sex                         | Men               | 1,261                     | 85.9  | 207                    | 14.1 | *    |
|                             | Women             | 1,105                     | 75.5  | 359                    | 24.5 |      |
| Age (years)                 | 40–49             | 248                       | 70.5  | 104                    | 29.5 | *    |
|                             | 50–59             | 904                       | 78.7  | 245                    | 21.3 |      |
|                             | 60–69             | 1,214                     | 84.8  | 217                    | 15.2 |      |
| Education                   | ≤Middle school    | 987                       | 77.8  | 281                    | 22.2 | *    |
|                             | High school       | 868                       | 82.0  | 191                    | 18.0 |      |
|                             | ≥College          | 487                       | 84.3  | 91                     | 15.7 |      |
|                             | Missing           | 24                        | 85.7  | 3                      | 11.1 |      |
| Income (million Korean won) | <1                | 779                       | 83.1  | 159                    | 16.9 | *    |
|                             | 1–2               | 588                       | 80.8  | 140                    | 19.2 |      |
|                             | 2–4               | 418                       | 78.3  | 116                    | 21.7 |      |
|                             | ≥4                | 581                       | 79.4  | 151                    | 19.3 |      |
|                             | Missing           | 204                       | 69.2  | 91                     | 30.9 |      |
| Occupation                  | White collar      | 618                       | 78.8  | 166                    | 21.2 | *    |
|                             | Blue collar       | 359                       | 81.8  | 80                     | 18.2 |      |
|                             | Housewife         | 702                       | 76.5  | 216                    | 23.5 |      |
|                             | Other             | 466                       | 88.6  | 60                     | 11.4 |      |
|                             | Missing           | 221                       | 83.4  | 44                     | 16.6 |      |
|                             | Marital status    | Living with spouse        | 2,073 | 80.9                   | 488  | 19.1 |
| Living without spouse       |                   | 293                       | 79    | 78                     | 21.0 |      |
| Comorbidities               | Hypertension      | 1,104                     | 84.5  | 202                    | 15.5 | *    |
|                             | No hypertension   | 1,262                     | 77.6  | 364                    | 22.4 |      |
|                             | Diabetes          | 465                       | 85.3  | 80                     | 14.6 | *    |
|                             | No diabetes       | 1,901                     | 79.6  | 486                    | 20.4 |      |
|                             | Hyperlipidemia    | 476                       | 79.7  | 121                    | 20.3 |      |
|                             | No hyperlipidemia | 1,890                     | 80.9  | 445                    | 19.1 |      |

\* Differences between two groups for the all variables were considered significant at a p value <0.05

Table 2. Estimations from the two-level multilevel logistic regression models of self-reported ongoing management among ischemic heart disease survivors in the Korea HEXA-Gem dataset, 2005-2013

|                                          | Model 1    |                         | Model 2    |                         | Model 3    |                         |
|------------------------------------------|------------|-------------------------|------------|-------------------------|------------|-------------------------|
|                                          | Odds Ratio | (95% Credible Interval) | Odds Ratio | (95% Credible Interval) | Odds Ratio | (95% Credible Interval) |
| <i>Fixed Parameters</i>                  |            |                         |            |                         |            |                         |
| Sex (ref. Female)                        |            |                         |            |                         |            |                         |
| Male                                     |            |                         | 1.83       | (1.38–2.39)             | 1.81       | (1.37–2.32)             |
| Age (years; ref. 40–49)                  |            |                         |            |                         |            |                         |
| 50–59                                    |            |                         | 1.57       | (1.16–2.07)             | 1.57       | (1.14-2.07)             |
| 61–69                                    |            |                         | 2.19       | (1.60–2.94)             | 2.19       | (1.56-2.93)             |
| Education (ref. ≤Middle school)          |            |                         |            |                         |            |                         |
| High school                              |            |                         | 1.35       | (1.06-1.66)             | 1.33       | (1.08-1.65)             |
| ≥College                                 |            |                         | 1.52       | (1.14-2.02)             | 1.63       | (1.22-2.12)             |
| Income (ref. <1 million Korean won)      |            |                         |            |                         |            |                         |
| 1–2 million                              |            |                         | 0.89       | (0.50-1.49)             | 0.88       | (0.37-1.48)             |
| 2–4 million                              |            |                         | 1.09       | (0.63-1.76)             | 1.14       | (0.66-1.87)             |
| ≥4 million                               |            |                         | 1.26       | (0.85-1.81)             | 1.07       | (0.70-1.65)             |
| Marital status (ref. Living with spouse) |            |                         |            |                         |            |                         |
| Living without spouse                    |            |                         | 1.08       | (0.82–1.42)             | 1.09       | (0.80-1.44)             |
| Occupation (ref. White collar)           |            |                         |            |                         |            |                         |
| Blue collar                              |            |                         | 1.11       | (0.79–1.53)             | 1.11       | (0.81-1.50)             |
| Housewife                                |            |                         | 1.13       | (0.84–1.48)             | 1.12       | (0.85-1.46)             |
| Other                                    |            |                         | 1.42       | (1.00–1.97)             | 1.42       | (0.99-1.97)             |
| Hypertension (ref. No)                   |            |                         |            |                         |            |                         |
| Yes                                      |            |                         | 1.49       | (1.20–1.84)             | 1.49       | (1.21-1.80)             |
| Diabetes (ref. No)                       |            |                         |            |                         |            |                         |
| Yes                                      |            |                         | 1.21       | (0.91–1.58)             | 1.20       | (0.91-1.57)             |
| Hyperlipidemia (ref. No)                 |            |                         |            |                         |            |                         |
| Yes                                      |            |                         | 0.91       | (0.67–1.23)             | 0.91       | (0.68-1.19)             |

1  
2  
3  
4  
5  
6  
7  
8  
9  
10  
11  
12  
13  
14  
15  
16  
17  
18  
19  
20  
21  
22  
23  
24  
25  
26  
27  
28  
29  
30  
31  
32  
33  
34  
35  
36  
37  
38  
39  
40  
41  
42  
43  
44  
45  
46  
47

|                                                     |         |             |         |             |         |             |
|-----------------------------------------------------|---------|-------------|---------|-------------|---------|-------------|
| Neighborhood-level income status                    | 1.39    | (1.15–1.66) |         |             | 1.22    | (1.01–1.61) |
| Neighborhood-level % of college graduates or higher | 1.06    | (0.86–1.30) |         |             | 1.12    | (0.89–1.41) |
| <i>Random Parameters</i>                            |         |             |         |             |         |             |
| Between-neighborhood variance                       | 0.11    | (0.02–0.32) | 0.14    | (0.03–0.37) | 0.16    | (0.03–0.46) |
| DIC                                                 | 2853.90 |             | 2756.97 |             | 2754.86 |             |

Note: Model 1 included the neighborhood-level SES only; model 2 included individual-level factors only; model 3 included all individual. All models were controlled for year dummies.

For peer review only

1  
2  
3  
4  
5  
6  
7  
8  
9  
10  
11  
12  
13  
14  
15  
16  
17  
18  
19  
20  
21  
22  
23  
24  
25  
26  
27  
28  
29  
30  
31  
32  
33  
34  
35  
36  
37  
38  
39  
40  
41  
42  
43  
44  
45  
46  
47  
48  
49  
50  
51  
52  
53  
54  
55  
56  
57  
58  
59  
60

Figure 1. Study areas of 17 major cities and counties in the Korea HEXA-Gem dataset, 2005-2013

For peer review only

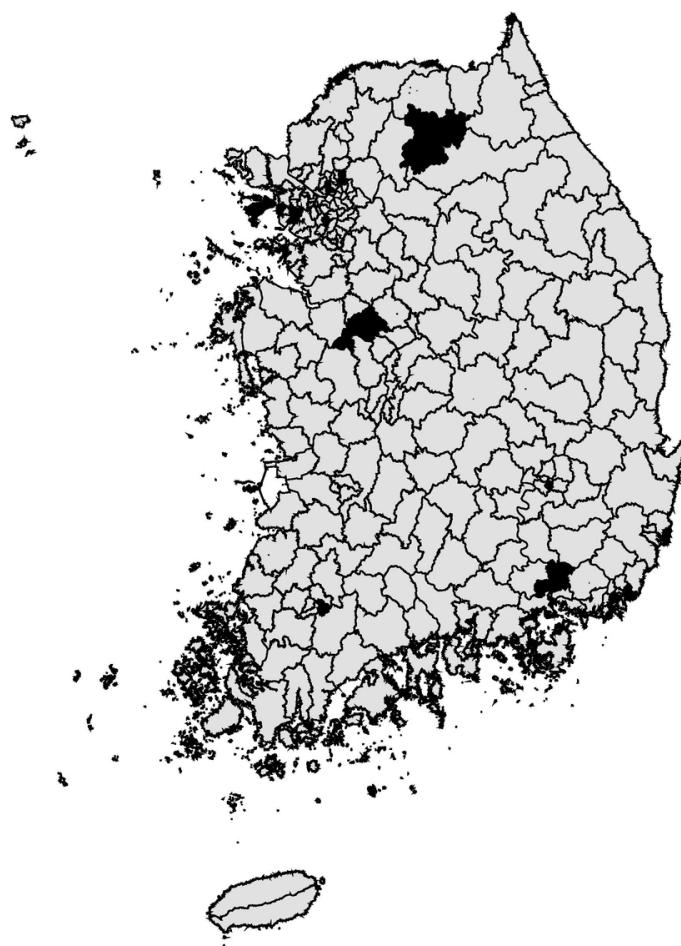

Figure 1. Study areas of 17 major cities and counties in the Korea HEXA-Gem dataset, 2005-2013

101x96mm (300 x 300 DPI)

1  
2  
3  
4  
5  
6  
7  
8  
9  
10  
11  
12  
13  
14  
15  
16  
17  
18  
19  
20  
21  
22  
23  
24  
25  
26  
27  
28  
29  
30  
31  
32  
33  
34  
35  
36  
37  
38  
39  
40  
41  
42  
43  
44  
45  
46  
47  
48  
49  
50  
51  
52  
53  
54  
55  
56  
57  
58  
59  
60STROBE Statement—Checklist of items that should be included in reports of *cross-sectional studies*

|                              | Item No | Recommendation                                                                                                                                                                                               | Page No. |
|------------------------------|---------|--------------------------------------------------------------------------------------------------------------------------------------------------------------------------------------------------------------|----------|
| <b>Title and abstract</b>    | 1       | (a) Indicate the study's design with a commonly used term in the title or the abstract                                                                                                                       | 2        |
|                              |         | (b) Provide in the abstract an informative and balanced summary of what was done and what was found                                                                                                          | 2        |
| <b>Introduction</b>          |         |                                                                                                                                                                                                              |          |
| Background/rationale         | 2       | Explain the scientific background and rationale for the investigation being reported                                                                                                                         | 4        |
| Objectives                   | 3       | State specific objectives, including any prespecified hypotheses                                                                                                                                             | 5        |
| <b>Methods</b>               |         |                                                                                                                                                                                                              |          |
| Study design                 | 4       | Present key elements of study design early in the paper                                                                                                                                                      | 5, 7     |
| Setting                      | 5       | Describe the setting, locations, and relevant dates, including periods of recruitment, exposure, follow-up, and data collection                                                                              | 5        |
| Participants                 | 6       | (a) Give the eligibility criteria, and the sources and methods of selection of participants                                                                                                                  | 5        |
| Variables                    | 7       | Clearly define all outcomes, exposures, predictors, potential confounders, and effect modifiers. Give diagnostic criteria, if applicable                                                                     | 6, 7     |
| Data sources/<br>measurement | 8*      | For each variable of interest, give sources of data and details of methods of assessment (measurement). Describe comparability of assessment methods if there is more than one group                         | 6, 7     |
| Bias                         | 9       | Describe any efforts to address potential sources of bias                                                                                                                                                    | 6, 7     |
| Study size                   | 10      | Explain how the study size was arrived at                                                                                                                                                                    | 6, 7     |
| Quantitative variables       | 11      | Explain how quantitative variables were handled in the analyses. If applicable, describe which groupings were chosen and why                                                                                 | 7        |
| Statistical methods          | 12      | (a) Describe all statistical methods, including those used to control for confounding                                                                                                                        | 7        |
|                              |         | (b) Describe any methods used to examine subgroups and interactions                                                                                                                                          | -        |
|                              |         | (c) Explain how missing data were addressed                                                                                                                                                                  | 7        |
|                              |         | (d) If applicable, describe analytical methods taking account of sampling strategy                                                                                                                           | 7        |
|                              |         | (e) Describe any sensitivity analyses                                                                                                                                                                        | -        |
| <b>Results</b>               |         |                                                                                                                                                                                                              |          |
| Participants                 | 13*     | (a) Report numbers of individuals at each stage of study—eg numbers potentially eligible, examined for eligibility, confirmed eligible, included in the study, completing follow-up, and analysed            | 8        |
|                              |         | (b) Give reasons for non-participation at each stage                                                                                                                                                         | -        |
|                              |         | (c) Consider use of a flow diagram                                                                                                                                                                           | -        |
| Descriptive data             | 14*     | (a) Give characteristics of study participants (eg demographic, clinical, social) and information on exposures and potential confounders                                                                     | 17       |
|                              |         | (b) Indicate number of participants with missing data for each variable of interest                                                                                                                          | 7        |
| Outcome data                 | 15*     | Report numbers of outcome events or summary measures                                                                                                                                                         | 8, 17    |
| Main results                 | 16      | (a) Give unadjusted estimates and, if applicable, confounder-adjusted estimates and their precision (eg, 95% confidence interval). Make clear which confounders were adjusted for and why they were included | 8-9, 18  |

|                          |    |                                                                                                                                                                            |    |
|--------------------------|----|----------------------------------------------------------------------------------------------------------------------------------------------------------------------------|----|
|                          |    | (b) Report category boundaries when continuous variables were categorized                                                                                                  | 17 |
|                          |    | (c) If relevant, consider translating estimates of relative risk into absolute risk for a meaningful time period                                                           | -  |
| Other analyses           | 17 | Report other analyses done—eg analyses of subgroups and interactions, and sensitivity analyses                                                                             | -  |
| <b>Discussion</b>        |    |                                                                                                                                                                            |    |
| Key results              | 18 | Summarise key results with reference to study objectives                                                                                                                   | 9  |
| Limitations              | 19 | Discuss limitations of the study, taking into account sources of potential bias or imprecision. Discuss both direction and magnitude of any potential bias                 | 11 |
| Interpretation           | 20 | Give a cautious overall interpretation of results considering objectives, limitations, multiplicity of analyses, results from similar studies, and other relevant evidence | 11 |
| Generalisability         | 21 | Discuss the generalisability (external validity) of the study results                                                                                                      | 11 |
| <b>Other information</b> |    |                                                                                                                                                                            |    |
| Funding                  | 22 | Give the source of funding and the role of the funders for the present study and, if applicable, for the original study on which the present article is based              | 13 |

\*Give information separately for exposed and unexposed groups.

**Note:** An Explanation and Elaboration article discusses each checklist item and gives methodological background and published examples of transparent reporting. The STROBE checklist is best used in conjunction with this article (freely available on the Web sites of PLoS Medicine at <http://www.plosmedicine.org/>, Annals of Internal Medicine at <http://www.annals.org/>, and Epidemiology at <http://www.epidem.com/>). Information on the STROBE Initiative is available at [www.strobe-statement.org](http://www.strobe-statement.org).



# BMJ Open

## Neighborhood- and Individual-level Socioeconomic Status and Self-reported Management of Ischemic Heart Disease: Cross-sectional Results from the Korea Health Examinees Study

|                                 |                                                                                                                                                                                                                                                                                                                                                                                                                                                                                                                                                                                                                                                                                                                                                    |
|---------------------------------|----------------------------------------------------------------------------------------------------------------------------------------------------------------------------------------------------------------------------------------------------------------------------------------------------------------------------------------------------------------------------------------------------------------------------------------------------------------------------------------------------------------------------------------------------------------------------------------------------------------------------------------------------------------------------------------------------------------------------------------------------|
| Journal:                        | <i>BMJ Open</i>                                                                                                                                                                                                                                                                                                                                                                                                                                                                                                                                                                                                                                                                                                                                    |
| Manuscript ID                   | bmjopen-2018-021577.R3                                                                                                                                                                                                                                                                                                                                                                                                                                                                                                                                                                                                                                                                                                                             |
| Article Type:                   | Research                                                                                                                                                                                                                                                                                                                                                                                                                                                                                                                                                                                                                                                                                                                                           |
| Date Submitted by the Author:   | 06-Feb-2019                                                                                                                                                                                                                                                                                                                                                                                                                                                                                                                                                                                                                                                                                                                                        |
| Complete List of Authors:       | Heo, Jongho; National Assembly Futures Institute<br>Oh, Juhwan; Seoul National University College of Medicine, JW Lee Center for Global Medicine<br>Lee, Hwa-Young; Seoul National University College of Medicine, JW LEE Center for Global Medicine<br>Choi, Ji-Yeob; Seoul National University College of Medicine,<br>Kim, Sujin; Korea Institute for Health and Social Affairs<br>Subramanian, S V; Harvard School of Public Health, Department of Society, Human Development and<br>Lee, Jong-Koo; Seoul National University College of Medicine, Department of Family Medicine; Seoul National University Hospital, Policy and Development<br>Kang, Daehee; College of Medicine Seoul National University, Department of Preventive Medicine |
| <b>Primary Subject Heading</b>: | Cardiovascular medicine                                                                                                                                                                                                                                                                                                                                                                                                                                                                                                                                                                                                                                                                                                                            |
| Secondary Subject Heading:      | Epidemiology, Public health                                                                                                                                                                                                                                                                                                                                                                                                                                                                                                                                                                                                                                                                                                                        |
| Keywords:                       | angina, myocardial infraction, multilevel analysis, MCMC, SES, Korea                                                                                                                                                                                                                                                                                                                                                                                                                                                                                                                                                                                                                                                                               |
|                                 |                                                                                                                                                                                                                                                                                                                                                                                                                                                                                                                                                                                                                                                                                                                                                    |

SCHOLARONE™  
Manuscripts

# Neighborhood- and Individual-level Socioeconomic Status and Self-reported Management of Ischemic Heart Disease: Cross-sectional Results from the Korea Health Examinees Study

Jongho Heo<sup>1</sup>, Juhwan Oh<sup>2</sup>, Hwa-Young Lee<sup>2</sup>, Ji-Yeob Choi<sup>3,4,5</sup>, Sujin Kim<sup>6,7</sup>, SV Subramanian<sup>8</sup>, Jong-Koo Lee<sup>\*2,9</sup>, and Daehee Kang<sup>\*3,4,5,10</sup>

<sup>1</sup>National Assembly Futures Institute, Seoul, Korea; <sup>2</sup>JW Lee Center for Global Medicine, Seoul National University College of Medicine, Seoul, Korea; <sup>3</sup>Department of Biomedical Sciences, Seoul National University Graduate School, Seoul, Korea; <sup>4</sup>Department of Preventive Medicine, Seoul National University College of Medicine, Seoul, Korea; <sup>5</sup>Cancer Research Institute, Seoul National University, Seoul, Korea; <sup>6</sup>Institute for Health and Environment, Seoul National University, Seoul, Korea; <sup>7</sup>Korea Institute for Health and Social Affairs, Sejong-si, South Korea; <sup>8</sup>Department of Social and Behavioral Science, Harvard School of Public Health, Boston, MA, USA; <sup>9</sup>Department of Family Medicine, Seoul National University College of Medicine, Seoul, Korea; <sup>10</sup>Institute of Environmental Medicine, Seoul National University Medical Research Center, Seoul, Korea

**\*JL and DK contributed equally to this paper as corresponding authors.**

**Corresponding author: Jong-Koo Lee**

JW Lee Center for Global Medicine  
Seoul National University College of Medicine  
Tel: +82-2-740-8922/ Fax: +82-2-766-1185  
E-mail: docmohw@snu.ac.kr

Main text word count: 2,569

Abstract word count: 248

# Neighborhood- and Individual-level Socioeconomic Status and Self-reported Management of Ischemic Heart Disease: Cross-sectional Results from the Korea Health Examinees Study

## Abstract

**Objective:** Several studies identified neighborhood context as a predictor of prognosis in ischemic heart disease (IHD). The present study investigates the relationships of neighborhood- and individual-level socioeconomic status (SES) with the odds of ongoing management of IHD, using baseline survey data from the Korea Health Examinees-Gem study.

**Design:** In this cross-sectional study, we estimated the association of the odds of self-reported ongoing management with the neighborhood-level income status and percentage of college graduates after controlling for individual-level covariates using two-level multilevel logistic regression models based on the Markov Chain Monte Carlo function.

**Setting:** A survey conducted at 17 large general hospitals in major Korean cities and metropolitan areas during 2005–2013.

**Participants:** 2,932 adult men and women.

**Outcome measure:** The self-reported status of management after incident angina or myocardial infarction.

**Results:** At the neighborhood level, residence in a higher-income neighborhood was associated with the self-reported ongoing management of IHD, after controlling for individual-level covariates [odds ratio (OR): 1.22, 95% credible interval (CI): 1.01–1.61]. At the individual level, higher education was associated with the ongoing IHD management (high school graduation, OR: 1.33, 95% CI: 1.08–1.65); college or higher, OR: 1.63, 95% CI: 1.22–2.12; reference, middle school graduation or below).

**Conclusions:** Our study suggests that policies or interventions aimed at improving the quality and availability of medical resources in low-income areas may associate with ongoing IHD management. Moreover, patient-centered education is essential for ongoing IHD management, especially when targeted to IHD patients with a low education level.

**Keywords:** angina, myocardial infarction, multilevel analysis, MCMC, SES, Korea

### Strengths and Limitations of this Study

- This study is among the first to examine the association between neighborhood- and individual-level SES and ongoing management of ischemic heart disease in Asian countries.
- Our study benefitted from the use of population-based samples, which enabled a multi-level analysis based on the neighborhood-level socioeconomic status.
- However, our findings were limited by the cross-sectional study design, use of survey data, and risk of selection bias.

## INTRODUCTION

Ischemic heart disease (IHD), the current leading cause of death in Western countries, is rapidly becoming the leading cause of death in developing countries.<sup>1</sup> To reduce the mortality associated with IHD, researchers and clinicians have stressed the importance of patient management. Based on evidence demonstrating that medication adherence and behavioral lifestyle changes improved prognosis and retarded disease progression, guidelines for secondary IHD prevention suggest that patient management should comprise pharmacologic treatments (e.g., antiplatelet therapy, beta-blocker therapy) or lifestyle modifications (e.g., weight control, smoking cessation, blood pressure management).<sup>2,3</sup>

Earlier research suggests that the management of post-IHD may differ by socioeconomic status (SES). Notably, the lower rates of mortality among IHD patients with a high SES<sup>4</sup> may be attributable to the availability of better care,<sup>5</sup> better adherence to therapy, better self-monitoring,<sup>6</sup> and more rapid implementation of behavioral lifestyle changes,<sup>7</sup> which are facilitated by economic, educational, and social resources. Independent of the individual-level SES, neighborhood contexts also play critical roles in various health outcomes, including IHD-related outcomes.<sup>8,9</sup> Several previous studies have shown that residence in a socioeconomically disadvantaged neighborhoods was associated with a greater risk of IHD<sup>10</sup> and shorter survival duration.<sup>12,13</sup> However, few studies have examined the association between the neighborhood SES and IHD management.

To our knowledge, no study has addressed this association in South Korea (hereafter Korea) or another Asian country. Although the IHD-related mortality rate in 2011 remained lower in Korea (42 per 100,000 individuals) than in Western countries, the incidence of IHD in Korea has increased by 60% during the past decade<sup>14</sup> consequent to increases in body mass index values and an increasingly westernized diet among middle-aged adults.<sup>15</sup> Secondary IHD

1  
2  
3  
4 mortality may be significantly reduced by ongoing IHD management involving both proper  
5 quality treatment and lifestyle modification, which may be shaped by neighborhood contexts  
6 as well as individual characteristics. Therefore, this study aimed to evaluate the individual-  
7 and neighborhood-level SES as the main determinants of ongoing IHD management in  
8 Korea, using baseline data from a large population-based cohort study with a multi-level  
9 framework.  
10  
11  
12  
13  
14  
15  
16  
17  
18  
19  
20  
21

## 22 **METHODS**

### 23 **Data source**

24  
25 We used baseline survey data from the Health Examinees-Gem (HEXA\_G) study, which was  
26 constructed by dropping inconsistent data collected during pilot HEXA survey periods. The  
27 original HEXA, which is part of the Korean Genome Epidemiology Study (KoGES),<sup>16</sup> was a  
28 large-scale genomic cohort study of 169,722 adults aged 40–69 years living in major Korean  
29 cities and metropolitan areas. Samples were recruited from 38 health examination centers and  
30 training hospitals (mainly general hospitals) during 2004–2013.<sup>17</sup> Eligible participants who  
31 visited the participating sites for biannual health check-ups, which were covered in full by the  
32 National Health Insurance Program were asked to respond voluntarily to an interview-based  
33 survey conducted by well-trained interviewers using a structured questionnaire. The survey  
34 collected information about socio-demographic characteristics, medical history, medication  
35 usage, family history, and health/lifestyle behaviors. More detailed information about the  
36 HEXA cohort study can be found elsewhere.<sup>16 17</sup> The HEXA-G dataset comprised 139,345  
37 participants [men: 46,977 (33.7%); women: 92,368 (66.3%)]. Participants were excluded  
38 because of inconsistencies in data quality control, bio-specimen collection, a short duration of  
39  
40  
41  
42  
43  
44  
45  
46  
47  
48  
49  
50  
51  
52  
53  
54  
55  
56  
57  
58  
59  
60

1  
2  
3  
4 study participation at 21 centers that participated in a pilot study, or the withdrawal of  
5  
6 provision of personal information for studies. All participants completed a consent form  
7  
8 before responding to the survey. The original HEXA and HEXA-G were deidentified for  
9  
10 research. The study was approved by the Institutional Review Board (IRB) of Seoul National  
11  
12 University Hospital, Seoul, Korea (IRB No. 0608-018-179).  
13  
14  
15  
16  
17  
18

### 19 **Patient and public involvement**

20  
21  
22 Patients and public were not involved in the design and conduct of this study. The results will  
23  
24 not be disseminated to study participants.  
25  
26  
27  
28  
29

### 30 **Study outcome**

31  
32  
33 The outcome of the study was the self-reported current management status after incident  
34  
35 angina or myocardial infarction. To identify participants with a history of IHD, the survey  
36  
37 included the yes/no question of “Have you ever been diagnosed with angina or myocardial  
38  
39 infarction by a medical doctor in a medical facility?” The sub-population that responded  
40  
41 “yes” then answered a sub-question regarding the current status of disease management for  
42  
43 which the following options were available: (a) “condition has been good or improved due to  
44  
45 management”; (b) “currently managed and treated”; (c) “was previously managed but is now  
46  
47 neglected”; and (d) “neither managed nor treated.” We dichotomized these responses as  
48  
49 “ongoing management” by combining (a) with (b) versus “failure of ongoing management”  
50  
51 (reference) by combining (c) with (d), respectively.  
52  
53  
54  
55  
56  
57  
58  
59  
60

### Neighborhood-level SES variables

The main neighborhood-level SES variables were (1) the regional median income status and (2) the regional mean percentage of college graduates. Seventeen neighborhoods were defined as 17 major cities and metropolitan areas (mean population: 201,210, range: 115,000-574,000) associated with 17 large general hospitals (Figure 1). The total catchment area of these hospitals covered 6.6% of the total Korean population. We obtained neighborhood-level SES data from a nationally and regionally representative dataset, Korea Community Health Survey (<https://chs.cdc.go.kr/chs/index.do>), which has been conducted in 253 communities annually since 2008. This survey aims to estimate regional patterns of disease prevalence and morbidity, as well as to understand the personal lifestyle and health behavior.<sup>18</sup> An average of 800-900 adults (age:  $\geq 19$  years) who resided in each neighborhood were selected using the probability proportional to sampling and systematic sampling methods. The sampling strategies are described in more detail elsewhere.<sup>18</sup> We calculated exogenous neighborhood-level SES measures using regional mean centering of the percentage of college graduates and median centering of the income status of the survey years. We then linked the regional SES indicators to our main dataset using the neighborhood identifier and the year variable. A comparison of socio-demographic characteristics between neighborhoods included and not included in the study revealed that the former was comprised of younger (age: 49.2 vs. 52.9 years), more highly educated (college graduates: 43.9% vs. 33.0%), and wealthier (the top 25% of household incomes: 30.9% vs. 27.8%) population.

### Individual-level SES variables



1  
2  
3  
4 Educational level was categorized into middle school or lower, high school graduation, or  
5 college graduation or higher. Income was measured by collapsing the data into four  
6  
7  
8 categories: <1, 1–2, 2–4, and  $\geq 4$  million Korean won (M KRW).  
9  
10  
11  
12  
13  
14  
15

## 16 **Covariates**

17  
18 The individual-level covariates included sex, age, marital status occupation, and  
19 comorbidities. Age was categorized into 40–50, 51–60, or 61+ years. Marital status was  
20 dichotomized into living with a spouse or not. Occupation was categorized as white collar,  
21 blue collar, housewife, or other. Comorbidities were defined as the presence of hypertension,  
22 diabetes, or hyperlipidemia at the time of the survey.  
23  
24  
25  
26  
27  
28  
29  
30  
31  
32  
33

## 34 **Statistical analysis**

35  
36 Two-level multilevel logistic regression models were fitted with individuals (level 1) nested  
37 within neighborhoods (level 2) to estimate the contributions of the individual- and  
38 neighborhood-level factors simultaneously. Random intercept models were fitted for the  
39 whole study samples to correct for cluster effects of the individual variables within the same  
40 neighborhood according to the neighborhood identifier in the model. We used the command  
41 *runmlwin* to run *MLwiN* within Stata software (Stata Corp. College Station, TX, USA).<sup>19</sup> This  
42 command enables researchers to fit multilevel models more quickly with *MLwiN* by taking  
43 advantage of the multi-level dataset analysis features included in Stata.<sup>19</sup> *MLwiN* was used to  
44 fit a binomial logit response model to an estimation using the Iterative Generalized Least  
45 Squares (IGLS) and second-order penalized quasi-likelihood (PQL2).  
46  
47  
48  
49  
50  
51  
52  
53  
54  
55  
56  
57  
58  
59  
60

1  
2  
3  
4 Estimates obtained using the above-described methods are known to exhibit a bias for  
5  
6 discrete responses;<sup>20</sup> therefore, we fitted our final model using the Markov chain Monte Carlo  
7  
8 (MCMC) function. Additionally, we adopted the Bayesian estimation function to ensure the  
9  
10 accuracy of the estimates and their standard errors, as a small sample size at level two can  
11  
12 lead to biased estimates.<sup>21 22</sup> The MCMC was conducted to burn-in for 500 simulations,  
13  
14 which yielded distribution starting values to discard, and subsequently to proceed for 5,000  
15  
16 additional simulations to obtain a precise estimate and distribution of interest. Once the  
17  
18 convergence diagnostics were confirmed, the odds ratios (ORs) and 95% credible intervals  
19  
20 (CIs) were presented in a Bayesian framework. We created separate missing dummy  
21  
22 categories to retain the missing cases in income (n=295), occupation (n=265), and other  
23  
24 covariate data (n=35) in the regression analysis. Due to of little interpretive value, the results  
25  
26 for the category were not reported. We did not stratify the analyses by gender because a  
27  
28 Chow test [47] failed to detect significant differences in the slopes and intercepts of the  
29  
30 gender-stratified regressions [F (1, 2,364) =0.95, P=0.3309].  
31  
32  
33  
34  
35  
36  
37  
38  
39

## 40 RESULTS

41  
42  
43 Table 1 presents the characteristics of participants with IHD from the HEXA-Gem dataset (n  
44  
45 = 2,932), stratified by self-reported IHD management. Men had higher proportions of self-  
46  
47 reported ongoing management than women (85.9% vs. 75.5%). Participants of younger  
48  
49 groups had higher proportions of failures of ongoing IHD management (40–49: 29.5% vs.  
50  
51 50–59: 21.3% vs. 60–69: 15.2%).  
52  
53  
54

55  
56 Table 2 presents the results of the two-level multilevel logistic regression models for ongoing  
57  
58 IHD management. In Model 1, the odds of ongoing management were higher for those with  
59  
60

1  
2  
3  
4 IHD who resided in higher-income neighborhoods, with an OR of 1.39 (95% CI: 1.15–1.66).  
5  
6 In Model 2, a higher individual education level was associated with ongoing IHD  
7  
8 management, with ORs of 1.35 (95% CI: 1.06–1.66) and 1.52 (95% CI: 1.14–2.02) for high  
9  
10 school graduation and college graduation or higher, respectively, compared to those with a  
11  
12 middle school or lower education. However, no significant associations were observed  
13  
14 between an individual's income group and the likelihood of self-reported ongoing  
15  
16 management. In Model 3, the neighborhood-level income status remained significantly  
17  
18 associated with self-reported ongoing management even after adjusting for individual-level  
19  
20 factors (OR: 1.22, 95% CI 1.01–1.61). In this model, however, the association of residence in  
21  
22 a neighborhood with a high percentage of college graduates with self-reported ongoing IHD  
23  
24 management was not statistically significant. Finally, all models exhibited significant  
25  
26 between-neighborhood variance.  
27  
28  
29  
30  
31  
32  
33  
34  
35

## 36 DISCUSSION

37  
38 According to our findings, residence in a neighborhood with a one-unit higher income was  
39  
40 associated with a 22% higher likelihood of self-reported ongoing IHD management,  
41  
42 compared to residence in a neighborhood with a lower income status. By contrast, at the  
43  
44 individual level, a higher income was not significantly associated with self-reported ongoing  
45  
46 IHD management. However, a higher individual education level was associated with a higher  
47  
48 likelihood of self-reported ongoing IHD management.  
49  
50  
51  
52

53 Previous studies have found that a lower neighborhood SES was associated with a higher risk  
54  
55 of IHD<sup>10 11</sup> and a shorter survival duration after incident IHD.<sup>12 13</sup> Consistent with those  
56  
57 reports, our study showed an association of the neighborhood SES with ongoing IHD  
58  
59  
60

1  
2  
3  
4 management that was independent of individual-level factors. We attribute this association to  
5  
6 several factors. First, residents of higher-income neighborhoods may have greater access to  
7  
8 higher quality medical resources, such as physicians or primary care clinics near their homes,  
9  
10 regardless of individual income.<sup>23</sup> Second, residents in higher-income neighborhoods may  
11  
12 enjoy a more favorable social environment for IHD management, which might include an  
13  
14 increased interest in health maintenance and a greater amount of social support from  
15  
16 neighbors.<sup>24</sup> Third, residents of lower-income neighborhoods might have reduced access to  
17  
18 health-oriented features such as recreation spaces and walkable environments<sup>25</sup> and stores  
19  
20 that sell healthy foods,<sup>26</sup> concomitant with increased access to stores selling cigarettes and/or  
21  
22 alcohol<sup>27</sup> and exposure to other environmental stressors. These factors may have important  
23  
24 implications for self-care practices.  
25  
26  
27  
28  
29

30 At the individual SES level, our study found that the education level was significantly  
31  
32 associated with ongoing IHD management, whereas the income status was not. Similarly,  
33  
34 previous studies also reported that IHD management may vary according to an individual's  
35  
36 SES, and suggested that the survivors with lower income and education levels might fail to  
37  
38 manage themselves appropriately because of (a) a lack of knowledge related to prevention  
39  
40 and healthy habits,<sup>28</sup> (b) limited access to care or drugs due to economic constraints,<sup>29</sup> and (c)  
41  
42 a lack of willingness or resources to change their lifestyles.<sup>7</sup> Patient education has been  
43  
44 identified as an important factor in terms of the understanding of a specific disease process,  
45  
46 medication management and adherence, and reported efficacies and side effects.<sup>3</sup> Previous  
47  
48 studies demonstrated improved adherence to suggested management among IHD patients  
49  
50 with higher education levels,<sup>30</sup> whereas patients with lower education levels may not adhere  
51  
52 to guidelines because of a lack of knowledge or understanding about their disease.  
53  
54  
55  
56

57 Alternatively, our study findings may reflect sub-optimal doctor-patient communication due  
58  
59  
60

1  
2  
3  
4 to the exceptionally short consultation times with physicians in Korea, which are generally  
5 restricted to 2–3 minutes because of the lack of physicians and fee-for-service payment in the  
6 Korean healthcare system.<sup>31</sup> This restriction may stunt ongoing IHD management, especially  
7 among patients with lower education levels. Accordingly, our findings suggest that  
8 individualized education could maximize IHD management outcomes.  
9  
10  
11  
12  
13  
14

15  
16 Our finding that the individual-level income status and ongoing IHD management were not  
17 associated may imply that economic barriers to care or drugs do not determine the ongoing  
18 management of this condition. However, previous studies have shown that economically  
19 disadvantaged patients might be more likely to decline follow-up procedures or prescribed  
20 medications because economic constraint.<sup>5,29</sup> Our favorable study finding of no significant  
21 income inequality might therefore be explained by the universal healthcare coverage benefits  
22 and medical subsidies provided to lower-income populations in Korea.<sup>31</sup>  
23  
24  
25  
26  
27  
28  
29  
30  
31  
32

33 Our study had several limitations of note. First, our cross-sectional study was unable to  
34 determine the causal relationship between our main exposures (e.g., individual- and  
35 neighborhood-level SES) and the self-reported management of IHD. Second, our study used  
36 self-reported survey data, which may have been biased by misclassification due to  
37 participants' misunderstanding or social desirability. Additionally, the participants' responses  
38 regarding ongoing IHD management may not have been confirmed by medical professionals  
39 whether the received treatment or participants' adherence to therapy was clinically  
40 appropriate. Third, we were not able to control for severity of IHD and time lapsed the acute  
41 event because of data limitations. Fourth, selection bias may have been introduced by non-  
42 random survey participation and attrition. Disadvantaged individuals were less likely to  
43 participate regular health examinations and were more likely to drop out in the survey,  
44 possibly due to a failure of ongoing management. This bias would have led to  
45  
46  
47  
48  
49  
50  
51  
52  
53  
54  
55  
56  
57  
58  
59  
60

1  
2  
3  
4 underestimating the likelihood of failure of ongoing management among disadvantaged  
5  
6 individuals. Fifth, we assumed that most participants visited the general hospitals within the  
7  
8 region they lived. This assumption is highly plausible, given the improved accessibility to the  
9  
10 health examination service in Korea contexts, as the National Health Insurance Program  
11  
12 provides free regular health examinations and medical facilities within and between regions  
13  
14 exhibit minimal variations in examination quality.<sup>32</sup> However, we could not completely  
15  
16 exclude the possibility that participants may have visited general hospitals in other  
17  
18 neighborhoods to seek better-quality evaluations. Despite these limitations, however, one  
19  
20 strength of our study was the use of population-based samples, which enabled a multi-level  
21  
22 analysis by linking neighborhood-level SES from the nationally and regionally representative  
23  
24 dataset. By contrast, most previous studies used hospital data, which frequently lack  
25  
26 information about the individual's SES and neighborhood characteristics.<sup>33</sup> Moreover, to the  
27  
28 best of our knowledge, this is among the first studies to examine the association between  
29  
30 individual- and neighborhood-level SES and IHD management in an Asian country.  
31  
32  
33  
34  
35

36  
37 In conclusion, our study findings provide an opportunity to improve ongoing IHD  
38  
39 management by identifying the neighborhood- and individual-level factors, which are  
40  
41 associated with SES-related and geographic inequalities in IHD mortality. Our results suggest  
42  
43 that policies or interventions intended to improve the quality and availability of medical  
44  
45 resources in low-income areas might also effectively reduce inequalities in management and,  
46  
47 ultimately, mortality. Moreover, our data suggest that patient-centered education is required  
48  
49 to ensure ongoing IHD management and reduce related mortality, particularly among patients  
50  
51 with a low education level.  
52  
53  
54  
55  
56  
57  
58  
59  
60

## Acknowledgments

This work was supported by a Research Program funded by the Korea Centers for Disease Control and Prevention (2004-E71004-00, 2005-E71011-00, 2005-E71009-00, 2006-E71001-00, 2006-E71004-00, 2006-E71010-00, 2006-E71003-00, 2007-E71004-00, 2007-E71006-00, 2008-E71006-00, 2008-E71008-00, 2009-E71009-00, 2010-E71006-00, 2011-E71006-00, 2012-E71001-00, and 2013-E71009-00).

## Author Contributions

JH analyzed the data; drafted, reviewed, and edited the manuscript; and contributed to the discussion. JKL and DK conducted, designed, and supervised the study; reviewed and edited the manuscript; and contributed to the discussion. JO, HYL, JYC, SK, and SVS reviewed and edited the manuscript and contributed to the discussion.

## Conflicts of Interest

The authors declare no conflicts of interest.

## A data sharing statement

Data sharing of HEXA is available through the website of the Korea National Institute of Health ([http://www.nih.go.kr/NIH/cms/content/eng/03/65203\\_view.html#menu4\\_1\\_2](http://www.nih.go.kr/NIH/cms/content/eng/03/65203_view.html#menu4_1_2)).

## References

1. Yusuf S, Reddy S, Ôunpuu S, et al. Global burden of cardiovascular diseases. *Circulation* 2001;104(23):2855-64.
2. Fihn SD, Gardin JM, Abrams J, et al. 2012 ACCF/AHA/ACP/AATS/PCNA/SCAI/STS Guideline for the Diagnosis and Management of Patients With Stable Ischemic Heart Disease. *Journal of the American College of Cardiology* 2012;24(60):e44-e164.
3. Fihn SD, Blankenship JC, Alexander KP, et al. 2014 ACC/AHA/AATS/PCNA/SCAI/STS focused update of the guideline for the diagnosis and management of patients with stable ischemic heart disease. *Circulation* 2014:CIR. 0000000000000095.
4. Molshatzki N, Drory Y, Myers V, et al. Role of socioeconomic status measures in long-term mortality risk prediction after myocardial infarction. *Medical care* 2011;49(7):673-78.
5. Philbin EF, McCullough PA, DiSalvo TG, et al. Socioeconomic status is an important determinant of the use of invasive procedures after acute myocardial infarction in New York State. *Circulation* 2000;102(19 Suppl 3):III107-III115.
6. Goldman DP, Smith JP. Can patient self-management help explain the SES health gradient? *Proceedings of the National Academy of Sciences* 2002;99(16):10929-34.
7. Lantz PM, Lynch JW, House JS, et al. Socioeconomic disparities in health change in a longitudinal study of US adults: the role of health-risk behaviors. *Social science & medicine* 2001;53(1):29-40.
8. Steenland K, Henley J, Calle E, et al. Individual-and area-level socioeconomic status variables as predictors of mortality in a cohort of 179,383 persons. *American journal of epidemiology* 2004;159(11):1047-56.
9. Kawachi I, Berkman LF. *Neighborhoods and health*: Oxford University Press 2003.
10. Sundquist K, Winkleby M, Ahlén H, et al. Neighborhood socioeconomic environment and incidence of coronary heart disease: a follow-up study of 25,319 women and men in Sweden. *American journal of epidemiology* 2004;159(7):655-62.
11. Merlo J, Ohlsson H, Chaix B, et al. Revisiting causal neighborhood effects on individual ischemic heart disease risk: a quasi-experimental multilevel analysis among Swedish siblings. *Social science & medicine* 2013;76:39-46.
12. Foraker RE, Patel MD, Whitsel EA, et al. Neighborhood socioeconomic disparities and 1-year case fatality after incident myocardial infarction: The Atherosclerosis Risk in Communities (ARIC) Community Surveillance (1992-2002). *American heart journal* 2013;165(1):102-07.
13. Chaix B, Rosvall M, Merlo J. Neighborhood socioeconomic deprivation and residential instability: effects on incidence of ischemic heart disease and survival after myocardial infarction. *Epidemiology* 2007;18(1):104-11.
14. OECD. *Health at a glance 2013: OECD indicators*: OECD publishing 2013.
15. Suh I, Oh KW, Lee KH, et al. Moderate dietary fat consumption as a risk factor for ischemic heart



- 1  
2  
3  
4 disease in a population with a low fat intake: a case-control study in Korean men. *The*  
5 *American journal of clinical nutrition* 2001;73(4):722-27.  
6  
7  
8 16. Kim Y, Han B-G. Cohort Profile: The Korean Genome and Epidemiology Study (KoGES)  
9 Consortium. *International journal of epidemiology* 2016:dyy316.  
10  
11 17. Shin S, Lee H-W, Kim CE, et al. Egg Consumption and Risk of Metabolic Syndrome in Korean  
12 Adults: Results from the Health Examinees Study. *Nutrients* 2017;9(7):687.  
13  
14 18. Kang YW, Ko YS, Kim YJ, et al. Korea community health survey data profiles. *Osong public health*  
15 *and research perspectives* 2015;6(3):211-17.  
16  
17 19. Leckie G, Charlton C. Runmlwin-a program to Run the MLwiN multilevel modelling software  
18 from within stata. *Journal of Statistical Software* 2013;52(11):1-40.  
19  
20 20. Snijders TA. Multilevel analysis. International Encyclopedia of Statistical Science: Springer  
21 2011:879-82.  
22  
23 21. Maas CJ, Hox JJ. Sufficient sample sizes for multilevel modeling. *Methodology* 2005;1(3):86-92.  
24  
25 22. McNeish DM, Stapleton LM. The effect of small sample size on two-level model estimates: A  
26 review and illustration. *Educational Psychology Review* 2016;28(2):295-314.  
27  
28 23. Kapral MK, Wang H, Mamdani M, et al. Effect of socioeconomic status on treatment and mortality  
29 after stroke. *Stroke* 2002;33(1):268-75.  
30  
31 24. Uchino BN. Social support and health: a review of physiological processes potentially underlying  
32 links to disease outcomes. *Journal of behavioral medicine* 2006;29(4):377-87.  
33  
34 25. Sallis JF, Saelens BE, Frank LD, et al. Neighborhood built environment and income: examining  
35 multiple health outcomes. *Social science & medicine* 2009;68(7):1285-93.  
36  
37 26. Mobley LR, Root ED, Finkelstein EA, et al. Environment, obesity, and cardiovascular disease risk  
38 in low-income women. *American journal of preventive medicine* 2006;30(4):327-32. e1.  
39  
40 27. Cantrell J, Anesetti-Rothermel A, Pearson JL, et al. The impact of the tobacco retail outlet  
41 environment on adult cessation and differences by neighborhood poverty. *Addiction*  
42 2015;110(1):152-61.  
43  
44 28. Bonaccio M, Bonanni AE, Di Castelnuovo A, et al. Low income is associated with poor adherence  
45 to a Mediterranean diet and a higher prevalence of obesity: cross-sectional results from the  
46 Moli-sani study. *BMJ open* 2012;2(6):e001685.  
47  
48 29. Forsberg PO, Li XJ, Sundquist K. Neighborhood socioeconomic characteristics and statin  
49 medication in patients with myocardial infarction: a Swedish nationwide follow-up study.  
50 *BMC Cardiovasc Disord* 2016;16:8. doi: 10.1186/s12872-016-0319-y  
51  
52 30. Kalichman SC, Catz S, Ramachandran B. Barriers to HIV/AIDS treatment and treatment adherence  
53 among African-American adults with disadvantaged education. *Journal of the National*  
54 *Medical Association* 1999;91(8):439.  
55  
56 31. Jones RS. Health-care reform in Korea. *OECD Economic Department Working Papers*  
57 2010(797):0\_1.  
58  
59 32. Cho B, Lee CM. Current situation of national health screening systems in Korea. *J Korean Med*  
60 *Assoc* 2011;54(7):666-69.

1  
2  
3  
4  
5 33. Shen JJ, Wan T, Perlin JB. An exploration of the complex relationship of socioecologic factors in  
6 the treatment and outcomes of acute myocardial infarction in disadvantaged populations.  
7 *Health services research* 2001;36(4):711.  
8  
9  
10  
11  
12  
13  
14  
15  
16  
17  
18  
19  
20  
21  
22  
23  
24  
25  
26  
27  
28  
29  
30  
31  
32  
33  
34  
35  
36  
37  
38  
39  
40  
41  
42  
43  
44  
45  
46  
47  
48  
49  
50  
51  
52  
53  
54  
55  
56  
57  
58  
59  
60

For peer review only

Table 1. Characteristics of the study sample from the Korea HEXA-Gem dataset (N = 2,932), 2005-2013, stratified by self-reported ongoing management of post-ischemic heart disease

|                             |                                                     | Ongoing management        |      |                        |      |   |
|-----------------------------|-----------------------------------------------------|---------------------------|------|------------------------|------|---|
|                             |                                                     | Yes<br>(N = 2,366, 80.7%) |      | No<br>(N = 566, 19.3%) |      |   |
| Individuals                 |                                                     | N                         | %    | N                      | %    |   |
| Sex                         | Men                                                 | 1,261                     | 85.9 | 207                    | 14.1 | * |
|                             | Women                                               | 1,105                     | 75.5 | 359                    | 24.5 |   |
| Age (years)                 | 40–49                                               | 248                       | 70.5 | 104                    | 29.5 | * |
|                             | 50–59                                               | 904                       | 78.7 | 245                    | 21.3 |   |
|                             | 60–69                                               | 1,214                     | 84.8 | 217                    | 15.2 |   |
| Education                   | ≤Middle school                                      | 987                       | 77.8 | 281                    | 22.2 | * |
|                             | High school                                         | 868                       | 82.0 | 191                    | 18.0 |   |
|                             | ≥College                                            | 487                       | 84.3 | 91                     | 15.7 |   |
|                             | Missing                                             | 24                        | 85.7 | 3                      | 11.1 |   |
| Income (million Korean won) | <1                                                  | 779                       | 83.1 | 159                    | 16.9 | * |
|                             | 1–2                                                 | 588                       | 80.8 | 140                    | 19.2 |   |
|                             | 2–4                                                 | 418                       | 78.3 | 116                    | 21.7 |   |
|                             | ≥4                                                  | 581                       | 79.4 | 151                    | 19.3 |   |
|                             | Missing                                             | 204                       | 69.2 | 91                     | 30.9 |   |
| Occupation                  | White collar                                        | 618                       | 78.8 | 166                    | 21.2 | * |
|                             | Blue collar                                         | 359                       | 81.8 | 80                     | 18.2 |   |
|                             | Housewife                                           | 702                       | 76.5 | 216                    | 23.5 |   |
|                             | Other                                               | 466                       | 88.6 | 60                     | 11.4 |   |
|                             | Missing                                             | 221                       | 83.4 | 44                     | 16.6 |   |
| Marital status              | Living with spouse                                  | 2,073                     | 80.9 | 488                    | 19.1 |   |
|                             | Living without spouse                               | 293                       | 79   | 78                     | 21.0 |   |
| Comorbidities               | Hypertension                                        | 1,104                     | 84.5 | 202                    | 15.5 | * |
|                             | No hypertension                                     | 1,262                     | 77.6 | 364                    | 22.4 |   |
|                             | Diabetes                                            | 465                       | 85.3 | 80                     | 14.6 | * |
|                             | No diabetes                                         | 1,901                     | 79.6 | 486                    | 20.4 |   |
|                             | Hyperlipidemia                                      | 476                       | 79.7 | 121                    | 20.3 |   |
|                             | No hyperlipidemia                                   | 1,890                     | 80.9 | 445                    | 19.1 |   |
| Neighborhoods               |                                                     | Mean                      |      | SD                     |      |   |
|                             | Neighborhood-level income status                    | 0.46                      |      | 0.98                   |      |   |
|                             | Neighborhood-level % of college graduates or higher | 0.10                      |      | 0.07                   |      |   |

\* Differences between two groups for the all variables were considered significant at a p value <0.05

Table 2. Estimations from the two-level multilevel logistic regression models of self-reported ongoing management among ischemic heart disease survivors in the Korea HEXA-Gem dataset, 2005-2013

|                                          | Model 1    |                         | Model 2    |                         | Model 3    |                         |
|------------------------------------------|------------|-------------------------|------------|-------------------------|------------|-------------------------|
|                                          | Odds Ratio | (95% Credible Interval) | Odds Ratio | (95% Credible Interval) | Odds Ratio | (95% Credible Interval) |
| <i>Fixed Parameters</i>                  |            |                         |            |                         |            |                         |
| Sex (ref. Female)                        |            |                         |            |                         |            |                         |
| Male                                     |            |                         | 1.83       | (1.38–2.39)             | 1.81       | (1.37–2.32)             |
| Age (years; ref. 40–49)                  |            |                         |            |                         |            |                         |
| 50–59                                    |            |                         | 1.57       | (1.16–2.07)             | 1.57       | (1.14–2.07)             |
| 61–69                                    |            |                         | 2.19       | (1.60–2.94)             | 2.19       | (1.56–2.93)             |
| Education (ref. ≤Middle school)          |            |                         |            |                         |            |                         |
| High school                              |            |                         | 1.35       | (1.06–1.66)             | 1.33       | (1.08–1.65)             |
| ≥College                                 |            |                         | 1.52       | (1.14–2.02)             | 1.63       | (1.22–2.12)             |
| Income (ref. <1 million Korean won)      |            |                         |            |                         |            |                         |
| 1–2 million                              |            |                         | 0.89       | (0.50–1.49)             | 0.88       | (0.37–1.48)             |
| 2–4 million                              |            |                         | 1.09       | (0.63–1.76)             | 1.14       | (0.66–1.87)             |
| ≥4 million                               |            |                         | 1.26       | (0.85–1.81)             | 1.07       | (0.70–1.65)             |
| Marital status (ref. Living with spouse) |            |                         |            |                         |            |                         |
| Living without spouse                    |            |                         | 1.08       | (0.82–1.42)             | 1.09       | (0.80–1.44)             |
| Occupation (ref. White collar)           |            |                         |            |                         |            |                         |
| Blue collar                              |            |                         | 1.11       | (0.79–1.53)             | 1.11       | (0.81–1.50)             |
| Housewife                                |            |                         | 1.13       | (0.84–1.48)             | 1.12       | (0.85–1.46)             |
| Other                                    |            |                         | 1.42       | (1.00–1.97)             | 1.42       | (0.99–1.97)             |
| Hypertension (ref. No)                   |            |                         |            |                         |            |                         |
| Yes                                      |            |                         | 1.49       | (1.20–1.84)             | 1.49       | (1.21–1.80)             |
| Diabetes (ref. No)                       |            |                         |            |                         |            |                         |
| Yes                                      |            |                         | 1.21       | (0.91–1.58)             | 1.20       | (0.91–1.57)             |
| Hyperlipidemia (ref. No)                 |            |                         |            |                         |            |                         |
| Yes                                      |            |                         | 0.91       | (0.67–1.23)             | 0.91       | (0.68–1.19)             |

|                                                     |         |             |         |             |         |             |
|-----------------------------------------------------|---------|-------------|---------|-------------|---------|-------------|
| Neighborhood-level income status                    | 1.39    | (1.15–1.66) |         |             | 1.22    | (1.01–1.61) |
| Neighborhood-level % of college graduates or higher | 1.06    | (0.86–1.30) |         |             | 1.12    | (0.89–1.41) |
| <i>Random Parameters</i>                            |         |             |         |             |         |             |
| Between-neighborhood variance                       | 0.11    | (0.02–0.32) | 0.14    | (0.03–0.37) | 0.16    | (0.03–0.46) |
| DIC                                                 | 2853.90 |             | 2756.97 |             | 2754.86 |             |

Note: Model 1 included the neighborhood-level SES only; model 2 included individual-level factors only; model 3 included all individual. All models were controlled for year dummies.

For peer review only

1  
2  
3  
4  
5  
6  
7  
8  
9  
10  
11  
12  
13  
14  
15  
16  
17  
18  
19  
20  
21  
22  
23  
24  
25  
26  
27  
28  
29  
30  
31  
32  
33  
34  
35  
36  
37  
38  
39  
40  
41  
42  
43  
44  
45  
46  
47  
48  
49  
50  
51  
52  
53  
54  
55  
56  
57  
58  
59  
60

Figure 1. Study areas of 17 major cities and counties in the Korea HEXA-Gem dataset, 2005-2013

For peer review only



Figure 1. Study areas of 17 major cities and counties in the Korea HEXA-Gem dataset, 2005-2013

101x96mm (300 x 300 DPI)

1  
2  
3  
4  
5  
6  
7  
8  
9  
10  
11  
12  
13  
14  
15  
16  
17  
18  
19  
20  
21  
22  
23  
24  
25  
26  
27  
28  
29  
30  
31  
32  
33  
34  
35  
36  
37  
38  
39  
40  
41  
42  
43  
44  
45  
46  
47  
48  
49  
50  
51  
52  
53  
54  
55  
56  
57  
58  
59  
60STROBE Statement—Checklist of items that should be included in reports of *cross-sectional studies*

|                           | Item No | Recommendation                                                                                                                                                                                               | Page No. |
|---------------------------|---------|--------------------------------------------------------------------------------------------------------------------------------------------------------------------------------------------------------------|----------|
| <b>Title and abstract</b> | 1       | (a) Indicate the study's design with a commonly used term in the title or the abstract                                                                                                                       | 2        |
|                           |         | (b) Provide in the abstract an informative and balanced summary of what was done and what was found                                                                                                          | 2        |
| <b>Introduction</b>       |         |                                                                                                                                                                                                              |          |
| Background/rationale      | 2       | Explain the scientific background and rationale for the investigation being reported                                                                                                                         | 4        |
| Objectives                | 3       | State specific objectives, including any prespecified hypotheses                                                                                                                                             | 5        |
| <b>Methods</b>            |         |                                                                                                                                                                                                              |          |
| Study design              | 4       | Present key elements of study design early in the paper                                                                                                                                                      | 5, 7     |
| Setting                   | 5       | Describe the setting, locations, and relevant dates, including periods of recruitment, exposure, follow-up, and data collection                                                                              | 5        |
| Participants              | 6       | (a) Give the eligibility criteria, and the sources and methods of selection of participants                                                                                                                  | 5        |
| Variables                 | 7       | Clearly define all outcomes, exposures, predictors, potential confounders, and effect modifiers. Give diagnostic criteria, if applicable                                                                     | 6, 7     |
| Data sources/measurement  | 8*      | For each variable of interest, give sources of data and details of methods of assessment (measurement). Describe comparability of assessment methods if there is more than one group                         | 6, 7     |
| Bias                      | 9       | Describe any efforts to address potential sources of bias                                                                                                                                                    | 6, 7     |
| Study size                | 10      | Explain how the study size was arrived at                                                                                                                                                                    | 6, 7     |
| Quantitative variables    | 11      | Explain how quantitative variables were handled in the analyses. If applicable, describe which groupings were chosen and why                                                                                 | 7        |
| Statistical methods       | 12      | (a) Describe all statistical methods, including those used to control for confounding                                                                                                                        | 7        |
|                           |         | (b) Describe any methods used to examine subgroups and interactions                                                                                                                                          | -        |
|                           |         | (c) Explain how missing data were addressed                                                                                                                                                                  | 7        |
|                           |         | (d) If applicable, describe analytical methods taking account of sampling strategy                                                                                                                           | 7        |
|                           |         | (e) Describe any sensitivity analyses                                                                                                                                                                        | -        |
| <b>Results</b>            |         |                                                                                                                                                                                                              |          |
| Participants              | 13*     | (a) Report numbers of individuals at each stage of study—eg numbers potentially eligible, examined for eligibility, confirmed eligible, included in the study, completing follow-up, and analysed            | 8        |
|                           |         | (b) Give reasons for non-participation at each stage                                                                                                                                                         | -        |
|                           |         | (c) Consider use of a flow diagram                                                                                                                                                                           | -        |
| Descriptive data          | 14*     | (a) Give characteristics of study participants (eg demographic, clinical, social) and information on exposures and potential confounders                                                                     | 17       |
|                           |         | (b) Indicate number of participants with missing data for each variable of interest                                                                                                                          | 7        |
| Outcome data              | 15*     | Report numbers of outcome events or summary measures                                                                                                                                                         | 8, 17    |
| Main results              | 16      | (a) Give unadjusted estimates and, if applicable, confounder-adjusted estimates and their precision (eg, 95% confidence interval). Make clear which confounders were adjusted for and why they were included | 8-9, 18  |



|                          |    |                                                                                                                                                                            |    |
|--------------------------|----|----------------------------------------------------------------------------------------------------------------------------------------------------------------------------|----|
|                          |    | (b) Report category boundaries when continuous variables were categorized                                                                                                  | 17 |
|                          |    | (c) If relevant, consider translating estimates of relative risk into absolute risk for a meaningful time period                                                           | -  |
| Other analyses           | 17 | Report other analyses done—eg analyses of subgroups and interactions, and sensitivity analyses                                                                             | -  |
| <b>Discussion</b>        |    |                                                                                                                                                                            |    |
| Key results              | 18 | Summarise key results with reference to study objectives                                                                                                                   | 9  |
| Limitations              | 19 | Discuss limitations of the study, taking into account sources of potential bias or imprecision. Discuss both direction and magnitude of any potential bias                 | 11 |
| Interpretation           | 20 | Give a cautious overall interpretation of results considering objectives, limitations, multiplicity of analyses, results from similar studies, and other relevant evidence | 11 |
| Generalisability         | 21 | Discuss the generalisability (external validity) of the study results                                                                                                      | 11 |
| <b>Other information</b> |    |                                                                                                                                                                            |    |
| Funding                  | 22 | Give the source of funding and the role of the funders for the present study and, if applicable, for the original study on which the present article is based              | 13 |

\*Give information separately for exposed and unexposed groups.

**Note:** An Explanation and Elaboration article discusses each checklist item and gives methodological background and published examples of transparent reporting. The STROBE checklist is best used in conjunction with this article (freely available on the Web sites of PLoS Medicine at <http://www.plosmedicine.org/>, Annals of Internal Medicine at <http://www.annals.org/>, and Epidemiology at <http://www.epidem.com/>). Information on the STROBE Initiative is available at [www.strobe-statement.org](http://www.strobe-statement.org).
